# Supplementary material for: Dynamic turnover of centromeres drives karyotype evolution in Drosophila
Source: eLife journal article supplement (doi:10.7554/elife.49002), 2019-09-16
Supplement: supp [file elife-49002-supp-v1.zip]

Archive with 26 entries (26 files):
- elife_poa_e49002_Figure_2_figure_supplement_3.pdf
- elife_poa_e49002_Figure_2_figure_supplement_1.pdf
- elife_poa_e49002_Figure_5_figure_supplement_3.pdf
- elife_poa_e49002_Supplementary_file_7.xlsx
- elife_poa_e49002_Figure_4_figure_supplement_1.pdf
- elife_poa_e49002_Figure_5_figure_supplement_2.pdf
- elife_poa_e49002_Figure_4_figure_supplement_4.pdf
- elife_poa_e49002_Supplementary_file_4.xlsx
- elife_poa_e49002_Supplementary_file_9.xlsx
- elife_poa_e49002_Supplementary_file_5.xlsx
- elife_poa_e49002_Figure_3_figure_supplement_1.pdf
- elife_poa_e49002_Supplementary_file_2.xlsx
- elife_poa_e49002_Figure_8_figure_supplement_1.pdf
- elife_poa_e49002_Supplementary_file_6.xlsx
- elife_poa_e49002_Figure_5_figure_supplement_1.pdf
- elife_poa_e49002_Figure_2_figure_supplement_2.pdf
- elife_poa_e49002_Supplementary_file_10.xlsx
- elife_poa_e49002_Figure_4_figure_supplement_3.pdf
- elife_poa_e49002_Figure_4_figure_supplement_5.pdf
- elife_poa_e49002_Supplementary_file_8.xlsx
- elife_poa_e49002_Supplementary_file_3.xlsx
- elife_poa_e49002_Transparent_Reporting_File.docx
- elife_poa_e49002_Supplementary_file_1.xlsx
- elife_poa_e49002_Figure_4_figure_supplement_2.pdf
- elife_poa_e49002_Figure_8_figure_supplement_2.pdf
- elife_poa_e49002_Figure_3_figure_supplement_2.pdf
