# Supplementary material for: Dynamic turnover of centromeres drives karyotype evolution in Drosophila
Source: eLife journal article supplement (doi:10.7554/elife.49002), 2019-09-16
Supplement: supp [file elife-49002-supp-v1.zip › elife_poa_e49002_Figure_4_figure_supplement_2.pdf]

|      |      |      |      |      |      |                    |
|------|------|------|------|------|------|--------------------|
| 0.09 | 0.05 | 0.15 | 0.07 | 0.03 | 0.05 | AC                 |
| 0.05 | 0.11 | 0.09 | 0.14 | 0.03 | 0.07 | AG                 |
| 0.02 | 0.02 | 0.01 | 0.00 | 0.01 | 0.00 | AT                 |
| 0.01 | 0.06 | 0.04 | 0.13 | 0.03 | 0.05 | AGC                |
| 0.01 | 0.01 | 0.03 | 0.03 | 0.01 | 0.01 | AAC                |
| 0.00 | 0.00 | 0.04 | 0.00 | 0.01 | 0.00 | AAT                |
| 0.00 | 0.00 | 0.00 | 0.01 | 0.00 | 0.00 | AGAT               |
| 0.00 | 0.00 | 0.03 | 0.00 | 0.00 | 0.00 | ACAG               |
| 0.00 | 0.00 | 0.01 | 0.19 | 0.00 | 0.00 | ACGG               |
| 0.00 | 0.00 | 0.00 | 0.00 | 0.08 | 0.00 | ACACAT             |
| 0.00 | 0.01 | 0.01 | 0.01 | 0.02 | 0.00 | ACATAT             |
| 0.00 | 0.00 | 0.00 | 0.03 | 0.00 | 0.00 | AACAAT             |
| 0.00 | 0.00 | 0.02 | 0.00 | 0.00 | 0.00 | ACAGAT             |
| 0.00 | 0.00 | 0.00 | 0.01 | 0.00 | 0.00 | ACCTAT             |
| 0.00 | 0.00 | 0.00 | 0.00 | 0.01 | 0.00 | ACAGACGG           |
| 0.39 | 0.00 | 0.00 | 0.00 | 0.00 | 0.00 | AACATGTAGAT        |
| 0.02 | 0.00 | 0.00 | 0.00 | 0.00 | 0.00 | AAAACATGTAG        |
| 0.01 | 0.00 | 0.00 | 0.00 | 0.00 | 0.00 | ACATAGGATCC        |
| 0.02 | 0.00 | 0.00 | 0.00 | 0.00 | 0.00 | ACAGCTCCAGCC       |
| 0.00 | 0.00 | 0.00 | 0.00 | 0.00 | 0.34 | ACAGGCAGAGAG       |
| 0.00 | 0.00 | 0.00 | 0.00 | 0.00 | 0.01 | AGAGAGCCAGGC       |
| 0.00 | 0.00 | 0.00 | 0.00 | 0.00 | 0.14 | ACAGGAGGCAGAGAG    |
| 0.00 | 0.00 | 0.00 | 0.01 | 0.00 | 0.00 | AAGCAGCAGGCGGCTCTG |

Dath

Dgua

Dlow

Dmir

Dpse

Dsub
