# Supplementary material for: Dynamic turnover of centromeres drives karyotype evolution in Drosophila
Source: eLife journal article supplement (doi:10.7554/elife.49002), 2019-09-16
Supplement: supp [file elife-49002-supp-v1.zip › elife_poa_e49002_Figure_4_figure_supplement_5.pdf]

Contig 7 (107-bp satellite)

Contig 6 (12-bp satellite)

Nanopore coverage

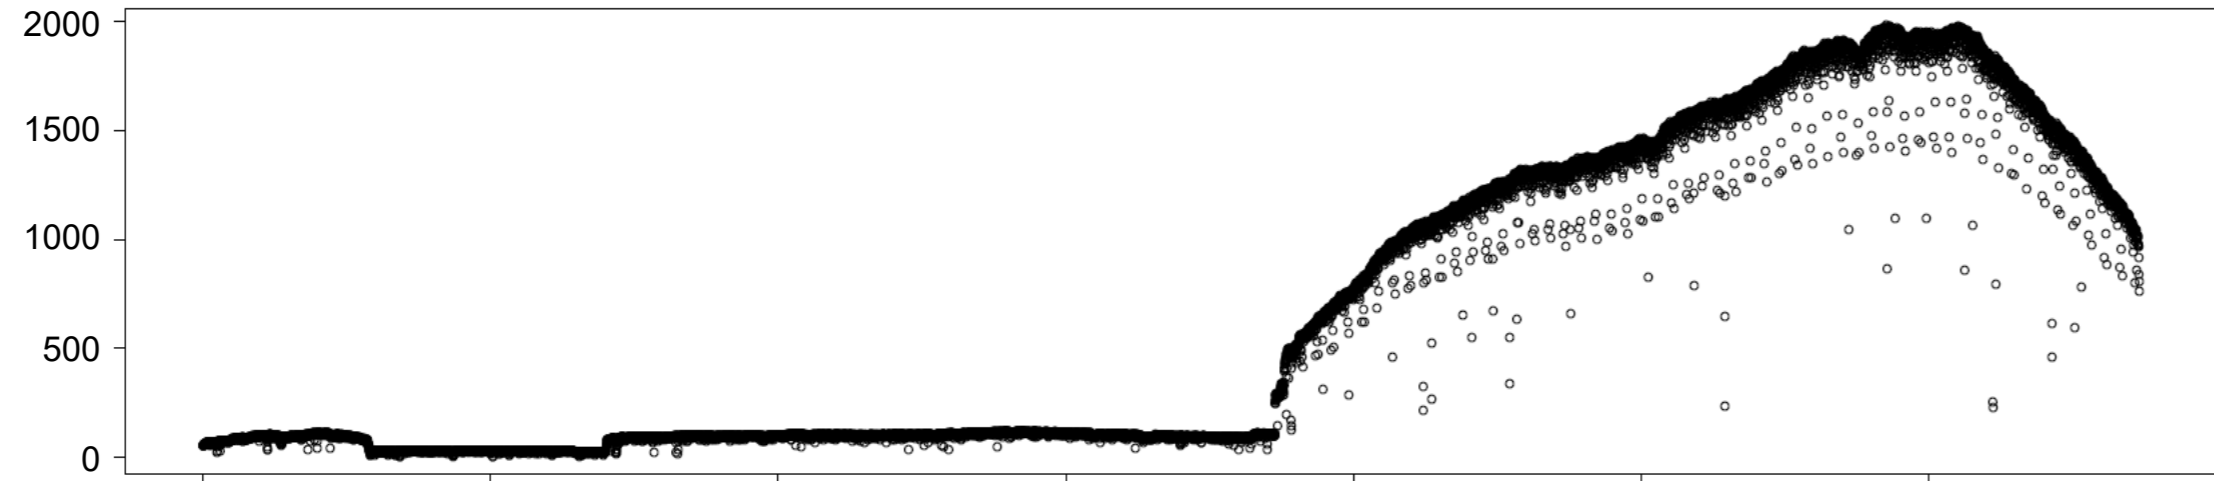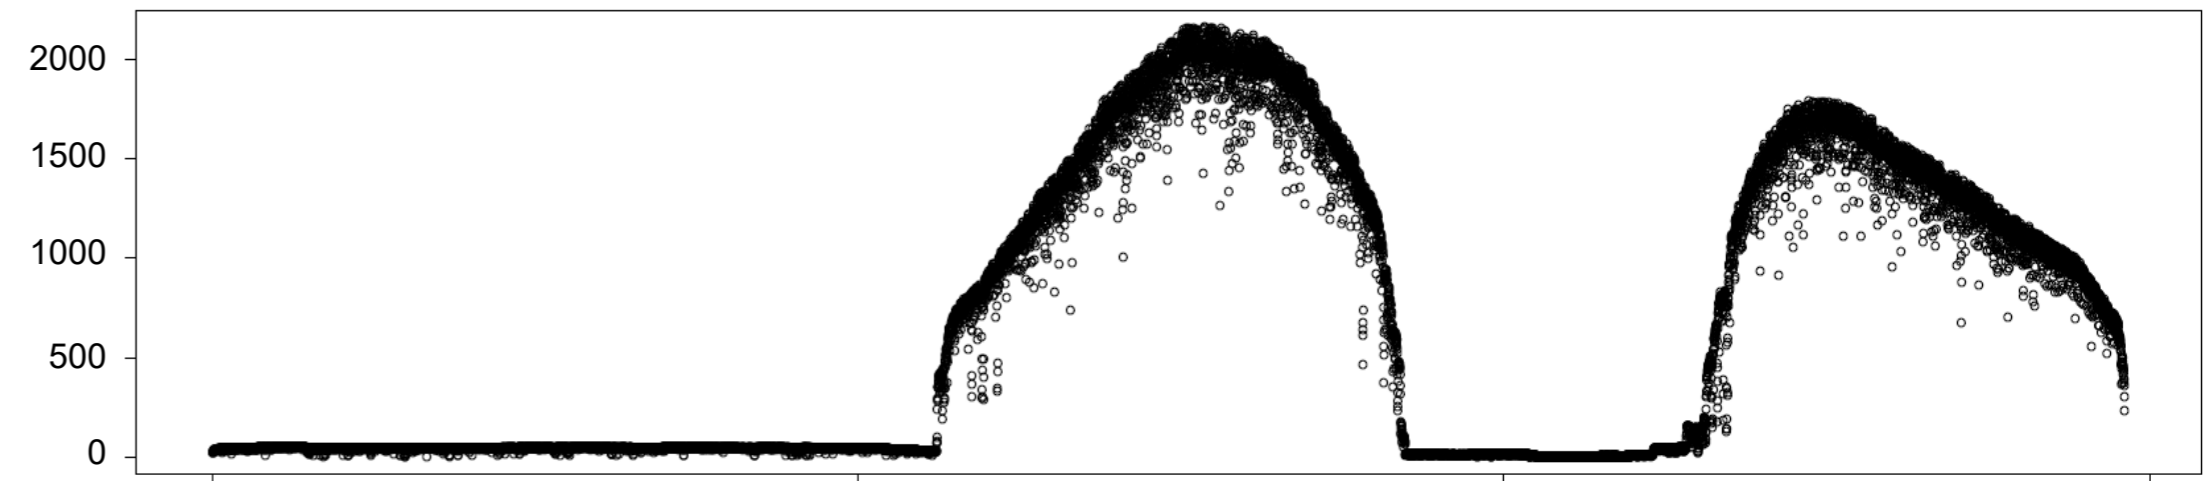

Illumina male coverage

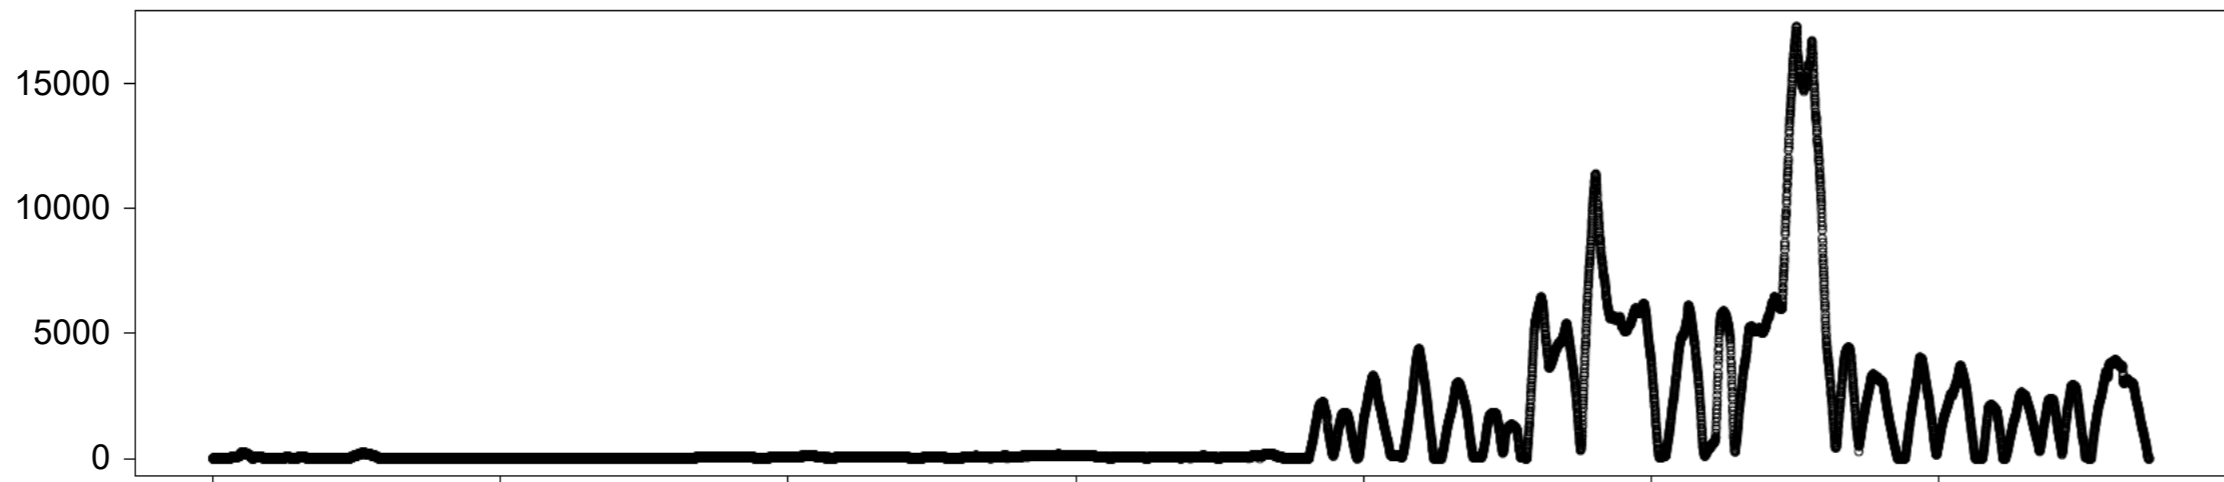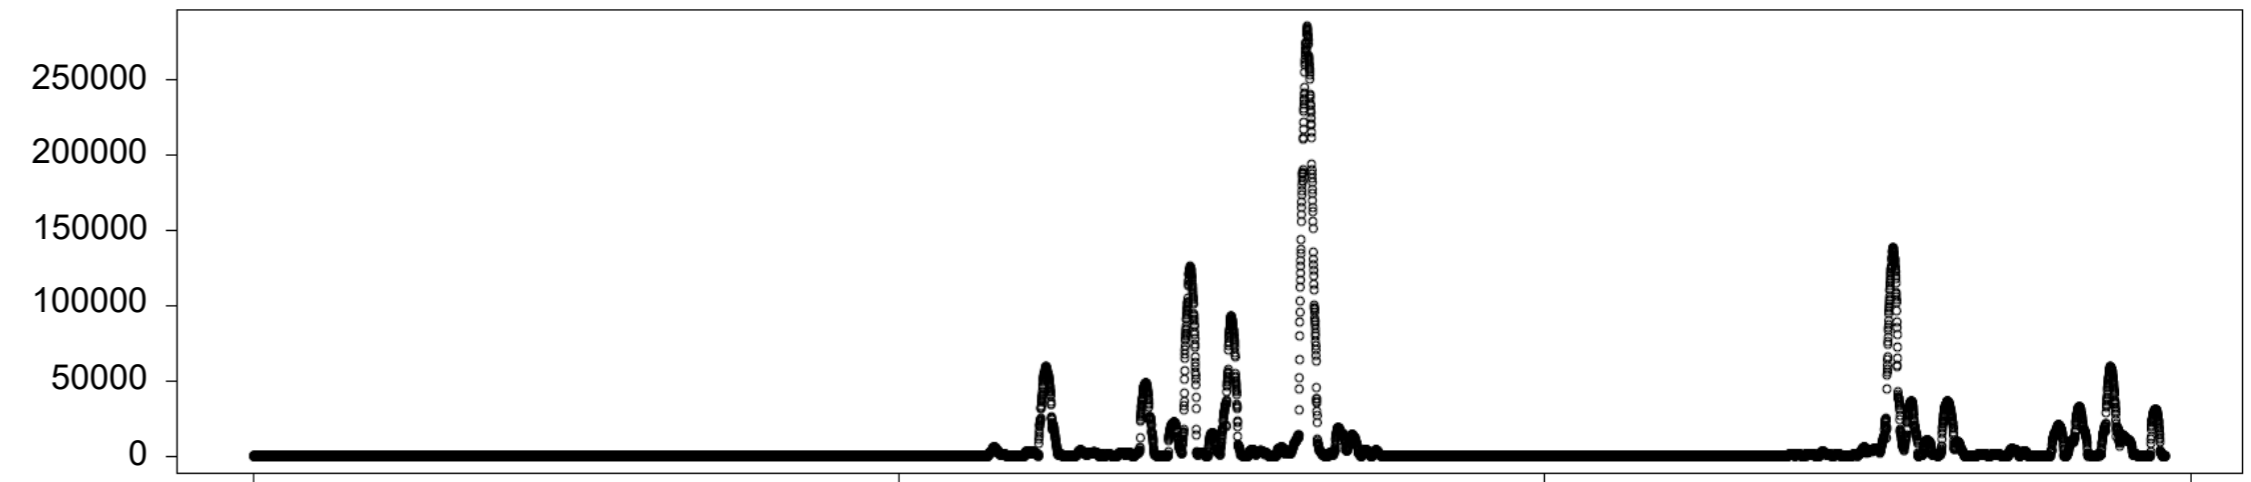

Illumina female coverage

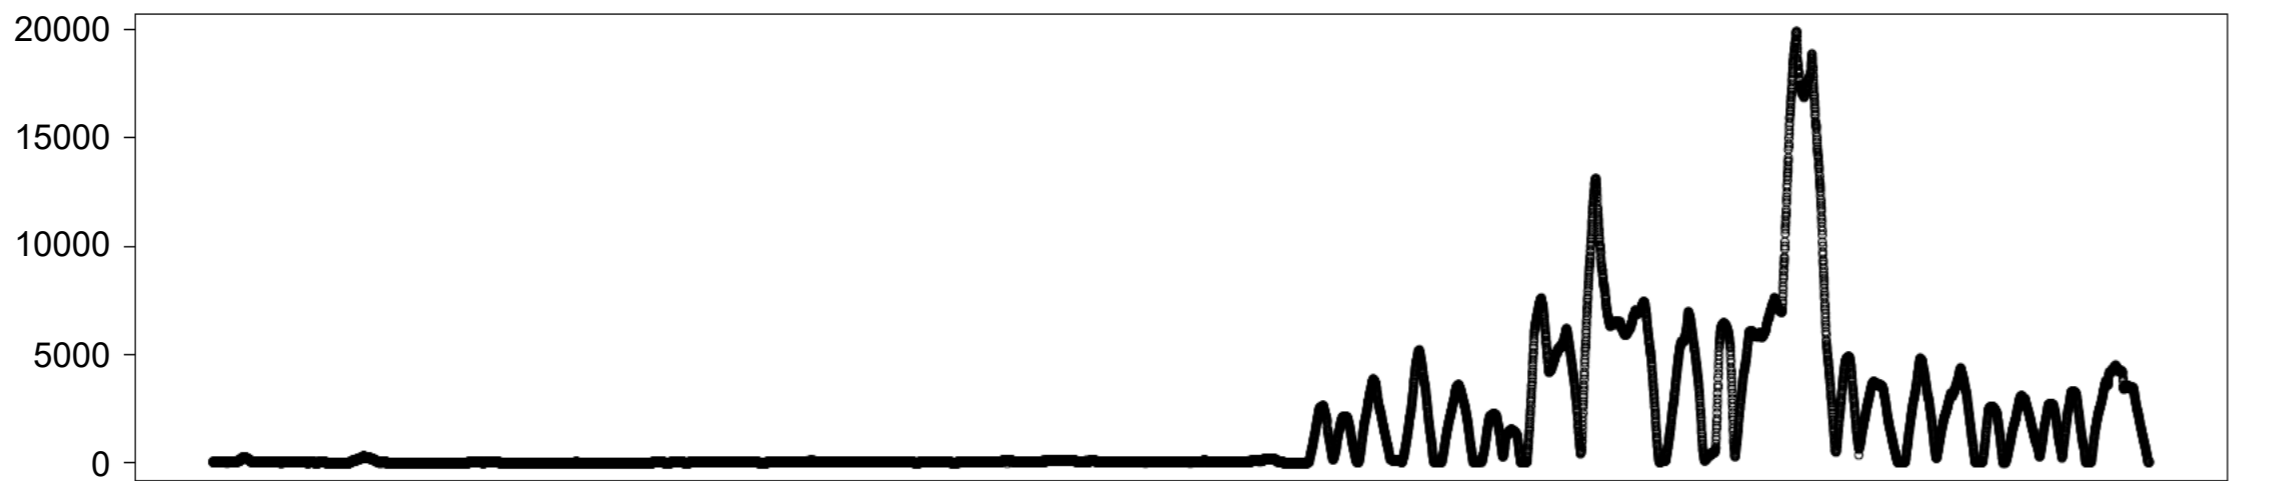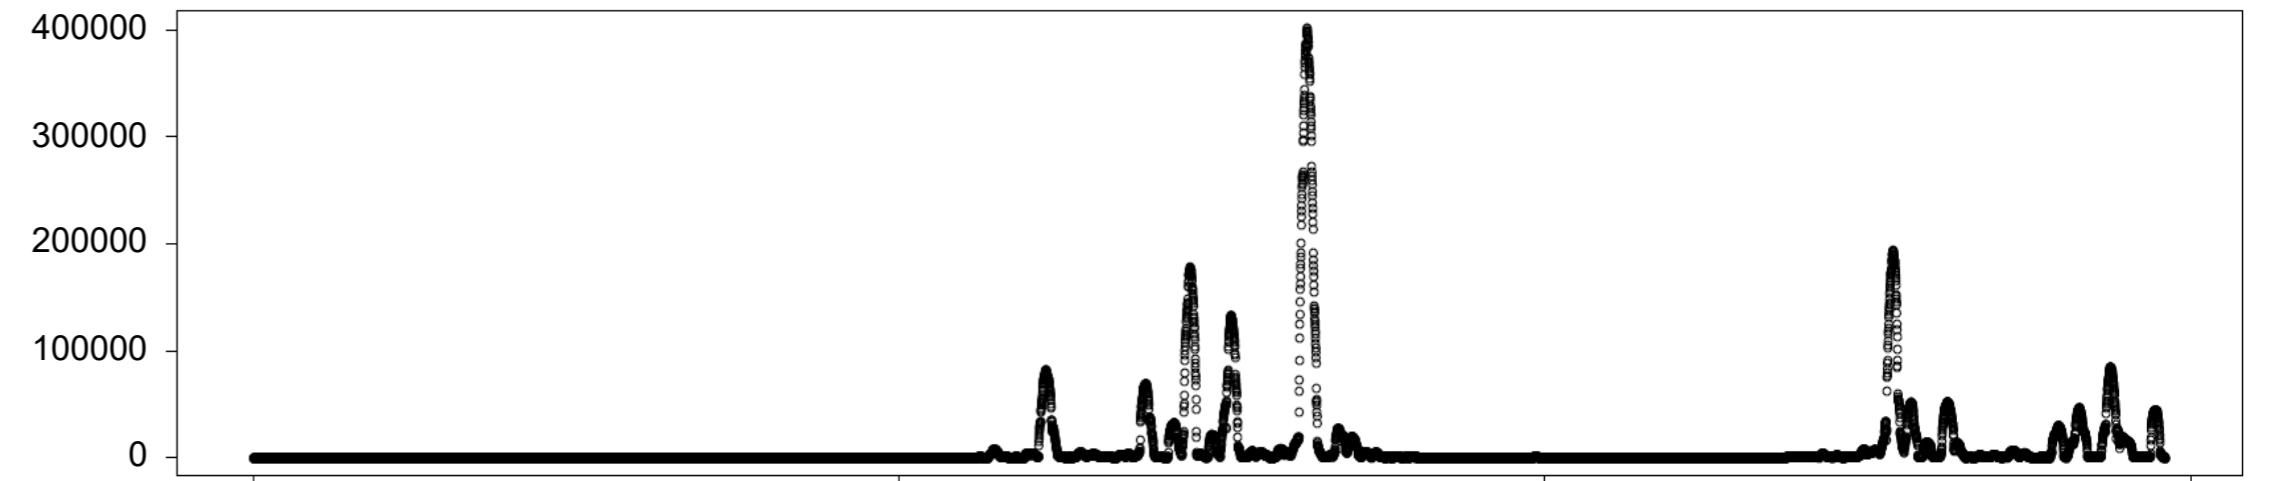

107-bp satellite region

(AGACAGGCAGAG)<sub>278</sub>

(CAGGCAGAGAGA)<sub>250</sub>
