# Supplementary material for: Dynamic turnover of centromeres drives karyotype evolution in Drosophila
Source: eLife journal article supplement (doi:10.7554/elife.49002), 2019-09-16
Supplement: supp [file elife-49002-supp-v1.zip › elife_poa_e49002_Supplementary_file_1.xlsx]

## Sheet: Table S1
Species	data type	tissue	sex	purpose	SRA accession
Drosophila athabasca (EA)	PacBio (13 SMRT cells)	whole adult insect	female	genome assembly	SRR9967649
	WGS Illumina 100bp PE	whole adult insect	male	identify sex linked scaffolds	SRR9967648
	WGS Illumina 100bp PE	whole adult insect	female	identify sex linked scaffolds and polish	SRR9967651
	RNAseq Illumina 100bp PE	whole larva(1)	female	genome annotation	SRR9967650
	RNAseq Illumina 100bp PE	larval heads(5)	female	genome annotation	SRR9967653
	RNAseq Illumina 100bp PE	ovaries(3 pair)	female	genome annotation	SRR9967652
	RNAseq Illumina 100bp PE	adult heads(8)	female	genome annotation	SRR9967655
	RNAseq Illumina 100bp PE	whole larva(1)	male	genome annotation	SRR9967654
	RNAseq Illumina 100bp PE	larval heads(5)	male	genome annotation	SRR9967657
	RNAseq Illumina 100bp PE	testes(3 pair)	male	genome annotation	SRR9967656
	RNAseq Illumina 100bp PE	adult heads(8)	male	genome annotation	SRR9967643
	ChIPseq Illumina 100bp PE	brain	female	heterochromatin identification	SRR9997947, SRR9997948
	Hi-C Illumina 100bp PE	larva	female	scaffold EB genome	SRR9997951
Drosophila athabasca (EB)	PacBio (13 SMRT cells)	whole adult insect	female	genome assembly	SRR9967642
	WGS Illumina 100bp PE	whole adult insect	male	identify sex linked scaffolds	SRR9967641
	WGS Illumina 100bp PE	whole adult insect	female	identify sex linked scaffolds and polish	SRR9967640
	RNAseq Illumina 100bp PE	whole larva(1)	female	genome annotation	SRR9967647
	RNAseq Illumina 100bp PE	larval heads(5)	female	genome annotation	SRR9967646
	RNAseq Illumina 100bp PE	ovaries(3 pair)	female	genome annotation	SRR9967645
	RNAseq Illumina 100bp PE	adult heads(8)	female	genome annotation	SRR9967644
	RNAseq Illumina 100bp PE	whole larva(1)	male	genome annotation	SRR9967638
	RNAseq Illumina 100bp PE	larval heads(5)	male	genome annotation	SRR9967637
	RNAseq Illumina 100bp PE	testes(6 pair)	male	genome annotation	SRR9967660
	RNAseq Illumina 100bp PE	adult heads(8)	male	genome annotation	SRR9967661
	ChIPseq Illumina 100bp PE	brain	female	heterochromatin identification	SRR9997949, SRR9997950
Drosophila subobscura	Nanopore (2 flowcells)	whole adult insect	female	genome assembly	SRR9967658
	WGS Illumina 100bp PE	whole adult insect	male	identify sex linked scaffolds	SRR9967659
	WGS Illumina 100bp PE	whole adult insect	female	identify sex linked scaffolds and polish	SRR9967664
	ChIPseq Illumina 100bp PE	brain	female	heterochromatin identification	SRR9997945, SRR9997946
	Hi-C Illumina 100bp PE	adult	female	scaffold genome	SRR9967665
Drosophila lowei	Nanopore (1 flowcell)	whole adult insect	male	genome assembly	SRR9967662
	WGS Illumina 100bp PE	whole adult insect	male	identify sex linked scaffolds and polish	SRR9967663
	WGS Illumina 100bp PE	whole adult insect	female	identify sex linked scaffolds	SRR9967667
	ChIPseq Illumina 100bp PE	brain	female	heterochromatin identification	SRR9997943, SRR9997944
	Hi-C Illumina 100bp PE	adult	male	scaffold genome	SRR9967668
Drosophila pseudoobscura	Nanopore (5 flowcells)	whole adult insect	male	genome assembly	SRR9967636
	WGS Illumina 100bp PE	larva(5)	male	identify sex linked scaffolds and polish	SRR9967635
	WGS Illumina 100bp PE	larva(5)	female	identify sex linked scaffolds	SRR9967639
	Hi-C Illumina 100bp PE	larvae	male	scaffold genome	SRR9967666
