# Supplementary material for: Dynamic turnover of centromeres drives karyotype evolution in Drosophila
Source: eLife journal article supplement (doi:10.7554/elife.49002), 2019-09-16
Supplement: supp [file elife-49002-supp-v1.zip › elife_poa_e49002_Supplementary_file_2.xlsx]

## Sheet: Sheet1
species	strain	collection location
Drosophila lowei	F1 males	Woodland Park, CO
Drosophila subobscura	14011-0131.10	Eugene, OR
Drosophila pseudoobscura	SSR2 (MV2-25)	Mesa Verde, CO
Drosophila athabasca	PA60 (EA)	Loleta, PA
Drosophila athabasca	NJ28 (EB)	Princeton, NJ
