# Supplementary material for: Dynamic turnover of centromeres drives karyotype evolution in Drosophila
Source: eLife journal article supplement (doi:10.7554/elife.49002), 2019-09-16
Supplement: supp [file elife-49002-supp-v1.zip › elife_poa_e49002_Supplementary_file_3.xlsx]

## Sheet: Sheet1
	Dath	Dpse	Dlow	Dsub
Complete	1057	1055	1036	1062
Complete single copy	1048	1048	1022	1054
Complete duplicated	9	7	14	8
Fragmented	1	3	1	0
Missing	8	8	29	4
Complete %	0.991557	0.989681	0.971857	0.996248
