# Supplementary material for: Dynamic turnover of centromeres drives karyotype evolution in Drosophila
Source: eLife journal article supplement (doi:10.7554/elife.49002), 2019-09-16
Supplement: supp [file elife-49002-supp-v1.zip › elife_poa_e49002_Supplementary_file_4.xlsx]

## Sheet: Sheet1
	Dsub	Dath	Dlow	Dpse
Muller A	2122	*	*	*
Muller B	2385	2663	2822	2748
Muller C	2515	2749	2705	2744
Muller D	2414	*	*	*
Muller E	3180	3405	3514	3371
Muller A-AD	*	4731	5296	5158
Muller F	90	104	108	101
Y-linked	*	*	*	191
unplaced	8	13	102	21
total	12714	13665	14547	14334
