# Supplementary material for: Dynamic turnover of centromeres drives karyotype evolution in Drosophila
Source: eLife journal article supplement (doi:10.7554/elife.49002), 2019-09-16
Supplement: supp [file elife-49002-supp-v1.zip › elife_poa_e49002_Supplementary_file_5.xlsx]

## Sheet: Sheet1
	Dsub	Dath	Dlow	Dmir	Dpse
Muller A	0.598267	*	*	*	*
Muller B	0.349679	0.825983	0.806065	0.864975	0.790242
Muller C	0.550123	0.796704	0.828891	0.8157	0.818481
Muller D	0.395071	*	*	*	*
Muller E	0.478705	0.809096	0.826318	0.946756	0.787056
Muller A-AD	*	0.809537	0.818117	0.836985	0.83975
Muller F	NA	NA	NA	NA	NA
