# Supplementary material for: Dynamic turnover of centromeres drives karyotype evolution in Drosophila
Source: eLife journal article supplement (doi:10.7554/elife.49002), 2019-09-16
Supplement: supp [file elife-49002-supp-v1.zip › elife_poa_e49002_Supplementary_file_6.xlsx]

## Sheet: Sheet1
Satellite sequence	Probe Name	Oligos	Label
AAAACTTATCTCCGCTGGCGG	21-mer	(AAAACTTATCTCCGCTGGCGG)2	5’ Cy5
AAAAAATCACTTTTGCACCAAACTCATTTTATGCCTAAATCGACCACATATTTAGCTTATTTGTACCCAAAATCGACCAAAACCGACACAATTTTAAC	99-mer	ATCACTTTTGCACCAAACTCATTTTATGCCTAAATCGACCACATATTTAGCTTATTTGTACCCAAAATCGACCAAAAACCGACACAATTT	5’ 6FAM, 3’ 6FAM
AAAAACACTTCCGGCCGCCATTTGCAAAGTGCGCCAAGGCAATATATAAGCGAATTGGAGTGTACGTCGGCTGCGAAGTGATTATGCACTGCAAATTAGGCCGAGGGAGATGAGAATGGGCTCCGGCCACTGTCCACGAAGTGCTCAAAATTAAGAGATG	160-mer	GGCAATATATAAGCGAATTGGAGTGTACGTCGGCTGCGAAGTGATTATGCACTGCAAATTAGGCCGAGGGAGATGAGAATGGGCTCCGGC	5’ Cy3, 3’ Cy3
ACAGGCAGAGAG	12-mer	(ACAGGCAGAGAG)7	5’ TYE665, 3’ TYE665
