# Supplementary material for: Dynamic turnover of centromeres drives karyotype evolution in Drosophila
Source: eLife journal article supplement (doi:10.7554/elife.49002), 2019-09-16
Supplement: supp [file elife-49002-supp-v1.zip › elife_poa_e49002_Supplementary_file_7.xlsx]

## Sheet: Sheet1
	seed region	non-seed region	P
repeat density (per 100kb)	0.151 (0.027)	0.079 (0.005)	<0.0001
genes (per 100kb)	15.7 (1.4)	9.73 (0.22)	<0.0001
gene GC%	0.400 (0.003)	0.520 (0.001)	<0.0001
intron GC%	0.304 (0.002)	0.420 (0.001)	<0.0001
exon GC%	0.420 (0.002)	0.538 (0.001)	<0.0001
intergene GC %	0.348 (0.002)	0.402 (0.001)	<0.0001
