# Supplementary material for: Dynamic turnover of centromeres drives karyotype evolution in Drosophila
Source: eLife journal article supplement (doi:10.7554/elife.49002), 2019-09-16
Supplement: supp [file elife-49002-supp-v1.zip › elife_poa_e49002_Supplementary_file_8.xlsx]

## Sheet: Sheet1
	Dsub	Dath	Dlow	Dpse	Dmir
Gypsy	2410082	6999954	11013274	6536351	11339345
Unspecified	1649970	5790858	6263131	5000041	4666744
Helitron	630939	1008536	3369290	2424702	4288730
Loa	485813	5099096	4294528	2963971	4402534
Cr1	455679	4521109	3293435	2369985	3570489
Jockey	370133	4084678	843867	763808	1271911
Bel	282602	7439488	9249720	5431775	6478811
total	6285218	34943719	38327245	25490633	36018564
