# Supplementary material for: Dynamic turnover of centromeres drives karyotype evolution in Drosophila
Source: eLife journal article supplement (doi:10.7554/elife.49002), 2019-09-16
Supplement: supp [file elife-49002-supp-v1.zip › elife_poa_e49002_Supplementary_file_9.xlsx]

## Sheet: Sheet1
Dsub	Muller A			Muller B			Muller C			Muller D			Muller E			Muller F
	TE	bp		TE	bp		TE	bp		TE	bp		TE	bp		TE	bp
	LOA-1B_DPer	34977		Daff_Helitron_4	36633		LOA-1B_DPer	25119		Daff_Helitron_4	24351		Dlow_Helitron_5	28307		LOA-1_DPer	10294
	BEL-7_DPe-I	51099		Dlow_Helitron_5	36848		T194_X.Unknown	28138		T194_X.Unknown	28607		T194_X.Unknown	37507		Dper_Jockey_70	10337
	MINIME_DP	51274		LOA-1_DPer	43262		MINIME_DP	29189		Polinton-1_DPe	31112		HelitronN-1_DPe	45301		T208_X.Unknown	10901
	HelitronN-1_DPe	58454		Gypsy8-I_Dpse	48973		HelitronN-1_DPe	32824		LOA-1_DPer	36651		MINIME_DP	45477		Dlow_Helitron_5	11957
	T213_X.Unknown	60155		T213_X.Unknown	53622		T218_X.Unknown	56332		HelitronN-1_DPe	44401		Polinton-1_DPe	47006		Jockey-2_DPer	12892
	Polinton-1_DPe	72069		Polinton-1_DPe	61547		Gypsy8-I_Dpse	59686		MINIME_DP	54489		CR1-1_DPer	59917		Mariner-3_Dro	13340
	LOA-1_DPer	95082		HelitronN-1_DPe	64941		T213_X.Unknown	67308		CR1-1_DPer	60186		LOA-1_DPer	69561		CR1-1_DPer	14566
	Gypsy8-I_Dpse	128950		MINIME_DP	69026		LOA-1_DPer	76316		T213_X.Unknown	62197		T213_X.Unknown	77417		HelitronN-1_DPe	15184
	CR1-1_DPer	141927		CR1-1_DPer	80123		CR1-1_DPer	92765		Gypsy8-I_Dpse	77272		Gypsy8-I_Dpse	102586		MINIME_DP	20009
	Dpse_Gypsy_6	269677		Dpse_Gypsy_6	324950		Dpse_Gypsy_6	166875		Dpse_Gypsy_6	233745		Dpse_Gypsy_6	232846		Dpse_Gypsy_6	91689
Dath	Muller A-AD			Muller B			Muller C			Muller E			Muller F
	TE	bp		TE	bp		TE	bp		TE	bp		TE	bp
	BEL-4_DPse-I	209883		BEL-1_DPer-I	412562		Gypsy8-I_Dpse	58168		Gypsy12-I_Dpse	159783		T192_X.Unknown	6416
	Gypsy12-I_Dpse	212485		Gypsy17-I_Dpse	429024		T34_X.Unknown	67239		BEL-1_DPer-I	181138		T150_X.Unknown	6460
	Gypsy8-I_Dpse	283094		CR1-2_DPer	450842		T24_X.Unknown	103997		CR1-2_DPer	264722		Dpse_Gypsy_6	7843
	BEL-3_DPer-I	330795		BEL-3_DPer-I	647029		CR1-2_DPer	107808		BEL-14_DP-I	271380		T221_X.Unknown	13861
	CR1-2_DPer	358087		BEL-14_DP-I	651589		LOA-1_DPer	111253		BEL-3_DPer-I	312530		Daff_PIF-Harbinger_199	14045
	LOA-1_DPer	458064		LOA-2_DPer	654393		BEL-3_DPer-I	122240		T32_LTR	388114		LOA-2_DPer	14677
	LOA-2_DPer	475012		LOA-1_DPer	704046		T32_LTR	122726		LOA-2_DPer	392481		LOA-1_DPer	17139
	T32_LTR	599043		T32_LTR	822738		LOA-2_DPer	146844		LOA-1_DPer	438514		T32_LTR	26089
	CR1-1_DPer	830340		CR1-1_DPer	1139540		CR1-1_DPer	237186		Daff_Jockey_18	666849		CR1-1_DPer	32879
	Daff_Jockey_18	1500268		Daff_Jockey_18	1277173		Daff_Jockey_18	278104		CR1-1_DPer	699041		Daff_Jockey_18	56739
Dlow	Muller A-AD			Muller B			Muller C			Muller E			Muller F
	TE	bp		TE	bp		TE	bp		TE	bp		TE	bp
	WORF_DMi	356753		WORF_DMi	79889		LOA-2_DPer	81485		Gypsy12-I_Dpse	347908		T164_X.Unknown	7851
	Dpse_Gypsy_6	367607		Dpse_Gypsy_6	80944		T172_X.Unknown	91697		BEL2-I_Dpse	348105		Gypsy15-LTR_Dpse	7988
	MINIME_DP	378070		MINIME_DP	85086		BEL-1_DPer-I	93814		LOA-2_DPer	348231		CR1-3_DPer	10185
	BEL-3_DPer-I	384129		LOA-2_DPer	98323		T158_X.Unknown	94413		Gypsy17-I_Dpse	362428		LOA-1_DPer	14191
	LOA-1_DPer	403458		T154_X.Unknown	102077		BEL-3_DPer-I	99055		BEL-3_DPer-I	404272		MINIME_DP	23648
	Gypsy12-I_Dpse	477123		T111_X.Unknown	108770		LOA-1_DPer	105345		BEL-1_DPer-I	422178		LOA-3_DPer	23833
	LOA-2_DPer	485604		Gypsy18-I_Dpse	132614		Nobel_I-int	120091		BEL-14_DP-I	429417		Dpse_Gypsy_6	25614
	LOA-3_DPer	621743		LOA-3_DPer	134868		LOA-3_DPer	157995		LOA-3_DPer	482681		CR1-1_DPer	30726
	CR1-1_DPer	1265944		CR1-1_DPer	216878		CR1-1_DPer	232822		CR1-1_DPer	818611		HelitronN-1_DPe	38390
	HelitronN-1_DPe	1267686		HelitronN-1_DPe	261314		HelitronN-1_DPe	270480		HelitronN-1_DPe	926960		Gypsy18-I_Dpse	38640
Dpse	Muller A-AD			Muller B			Muller C			Muller E			Muller F
	TE	bp		TE	bp		TE	bp		TE	bp		TE	bp
	LOA-1_DPer	354877		LOA-2_DPer	90853		Gypsy18-I_Dpse	69283		T113_X.Unknown	52913		WORF_DMi	13828
	BEL-3_DPer-I	366462		Gypsy17-I_Dpse	94789		BEL2-I_Dpse	75744		LOA-3_DPer	60212		LOA-1_DPer	15357
	WORF_DMi	386849		WORF_DMi	95699		BEL-1_DPer-I	82097		Dmir_hAT-Blackjack_169	60578		Jockey-3_DPer	19056
	Gypsy17-I_Dpse	387218		LOA-1_DPer	101726		T172_X.Unknown	82639		Dpse_Gypsy_6	66407		LOA-2_DPer	22720
	T119_X.Unknown	476041		T111_X.Unknown	111224		LOA-2_DPer	89412		T194_X.Unknown	66540		Dpse_Gypsy_6	23991
	LOA-2_DPer	490699		LOA-3_DPer	119969		WORF_DMi	94937		Gypsy8-I_Dpse	79616		MINIME_DP	28157
	T154_X.Unknown	615613		BEL-3_DPer-I	131651		LOA-3_DPer	116759		Gypsy18-I_Dpse	82011		Jockey-2_DPer	33470
	LOA-3_DPer	678820		T154_X.Unknown	149910		BEL-3_DPer-I	120405		T172_X.Unknown	82621		LOA-3_DPer	49234
	HelitronN-1_DPe	1047147		CR1-1_DPer	279090		HelitronN-1_DPe	240388		CR1-1_DPer	92154		CR1-1_DPer	82587
	CR1-1_DPer	1311835		HelitronN-1_DPe	330099		CR1-1_DPer	316673		HelitronN-1_DPe	226058		HelitronN-1_DPe	119130
Dmir	Muller A			Muller AD			Muller B			Muller C			Muller E			Muller F
	TE	bp		TE	bp		TE	bp		TE	bp		TE	bp		TE	bp
	T129_X.Unknown	66606		BEL-4_DPer-I	388395		T111_X.Unknown	109556		Dmir_hAT-Blackjack_169	90008		Dpse_Gypsy_6	80868		MINIME_DP	22111
	Dpse_Gypsy_6	94960		BEL-1_DPer-I	401515		LOA-1_DPer	110964		T172_X.Unknown	97238		Dmir_hAT-Blackjack_169	82945		LOA-2_DPer	22480
	Gypsy17-I_Dpse	97138		BEL-3_DPer-I	408655		LOA-2_DPer	119713		BEL-4_DPer-I	98633		LOA-2_DPer	90952		WORF_DMi	23244
	Gypsy3-I_Dpse	104486		LOA-1_DPer	453760		T150_X.Unknown	134962		BEL-3_DPer-I	121386		Gypsy8-I_Dpse	94370		Copia1-I_Dpse	26334
	R1_DPs	110475		WORF_DMi	656757		LOA-3_DPer	138092		WORF_DMi	158842		T172_X.Unknown	96176		Dpse_Gypsy_6	28530
	LOA-2_DPer	129071		LOA-2_DPer	663785		BEL-4_DPer-I	138816		LOA-3_DPer	182039		LOA-3_DPer	111279		LOA-3_DPer	34186
	Gypsy8-I_Dpse	136047		Gypsy17-I_Dpse	667242		WORF_DMi	142578		LOA-2_DPer	182940		Jockey-2_DPer	136382		CR1-1_DPer	84910
	LOA-3_DPer	144870		LOA-3_DPer	947523		CR1-1_DPer	396658		Gypsy18-I_Dpse	239145		CR1-1_DPer	230538		HelitronN-1_DPe	107305
	CR1-1_DPer	146433		HelitronN-1_DPe	1872998		HelitronN-1_DPe	414508		CR1-1_DPer	348543		HelitronN-1_DPe	305536		Jockey-2_DPer	119971
	HelitronN-1_DPe	561419		CR1-1_DPer	1941535		Gypsy18-I_Dpse	801675		HelitronN-1_DPe	573147		Gypsy18-I_Dpse	792094		Gypsy18-I_Dpse	358483
