# Supplementary material for: Dynamic turnover of centromeres drives karyotype evolution in Drosophila
Source: eLife journal article supplement (doi:10.7554/elife.49002), 2019-09-16
Supplement: supp [file elife-49002-supp-v1.zip › elife_poa_e49002_Supplementary_file_10.xlsx]

## Sheet: Sheet1
	Dath	Dpse	Dsub	Dlow
Sequenced read pairs	31554879	20424850	21803359	22080790
Total Hi-C contacts	2705357	1744038	14998459	12706059
Inter-chromosomal	274323	748111	2764639	2811959
Intra-chromosomal	2431034	995927	12233820	9894100
