# Supplementary material for: Dynamic turnover of centromeres drives karyotype evolution in Drosophila
Source: eLife journal article supplement (doi:10.7554/elife.49002), 2019-09-16
Supplement: supp [file elife_poa_e49002_Figure_8_figure_supplement_2.pdf › elife_poa_e49002_Figure_8_figure_supplement_2.pdf]

Dpse

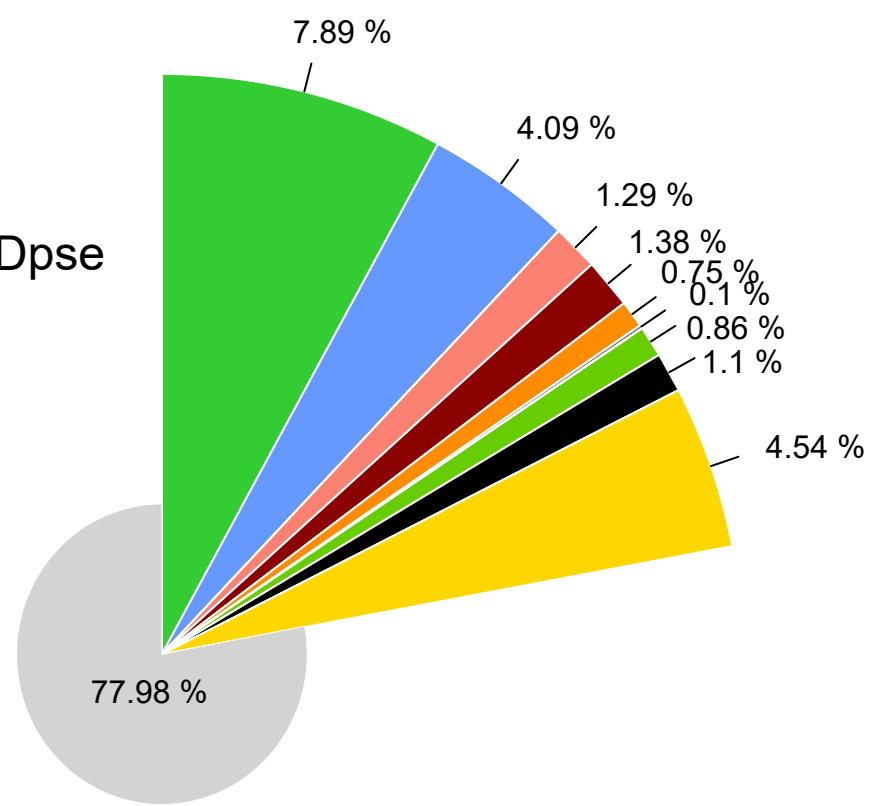

Dath

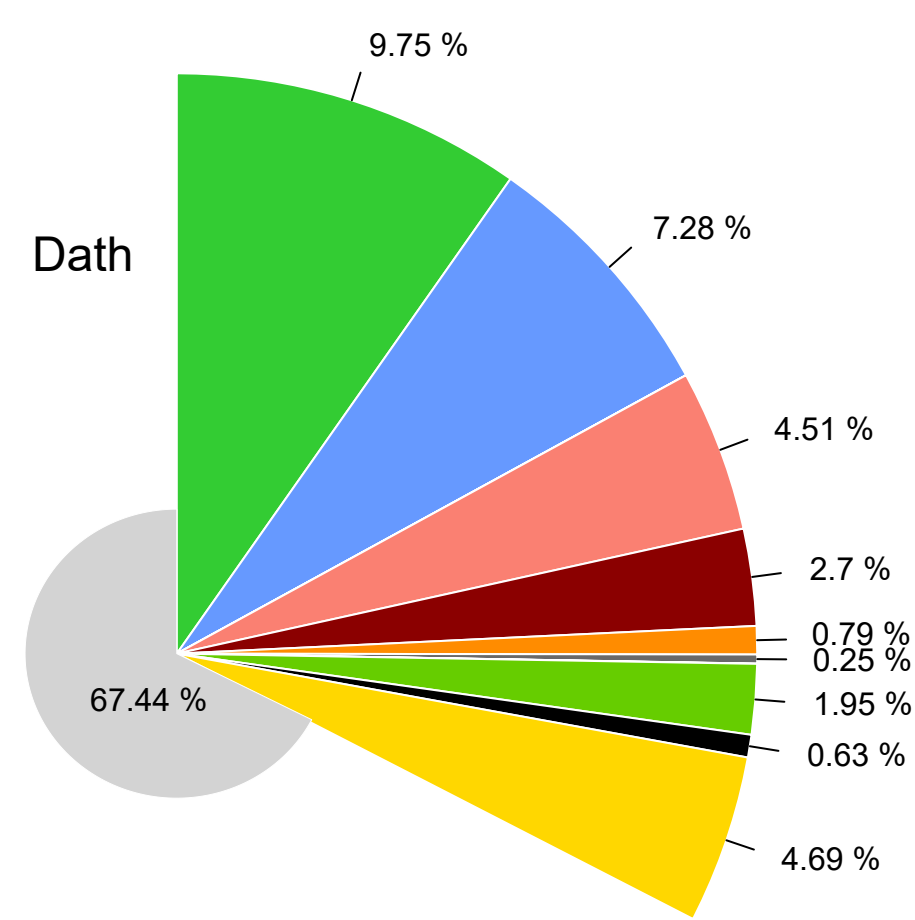

Dsub

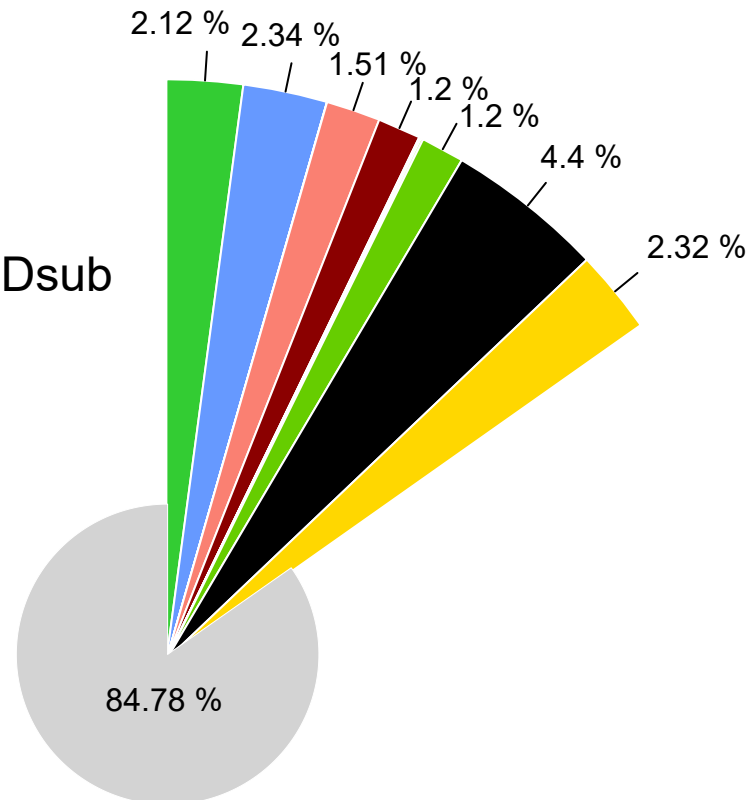

Dlow

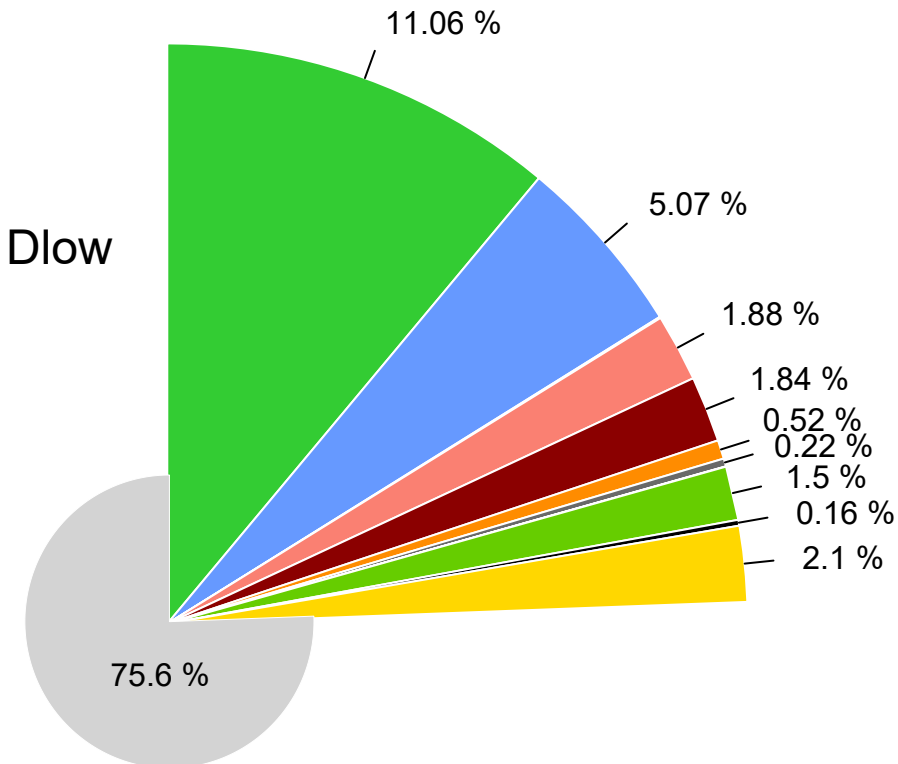

- LTR
- LINE
- SINE
- DNA
- Helitron
- rRNA
- Low\_Complexity
- Satellite
- Simple\_repeat
- others
- na
- Single or low copy DNA
