# Supplementary figures and images for: Dynamic turnover of centromeres drives karyotype evolution in Drosophila
Source: eLife journal article supplement (doi:10.7554/elife.49002), 2019-09-16

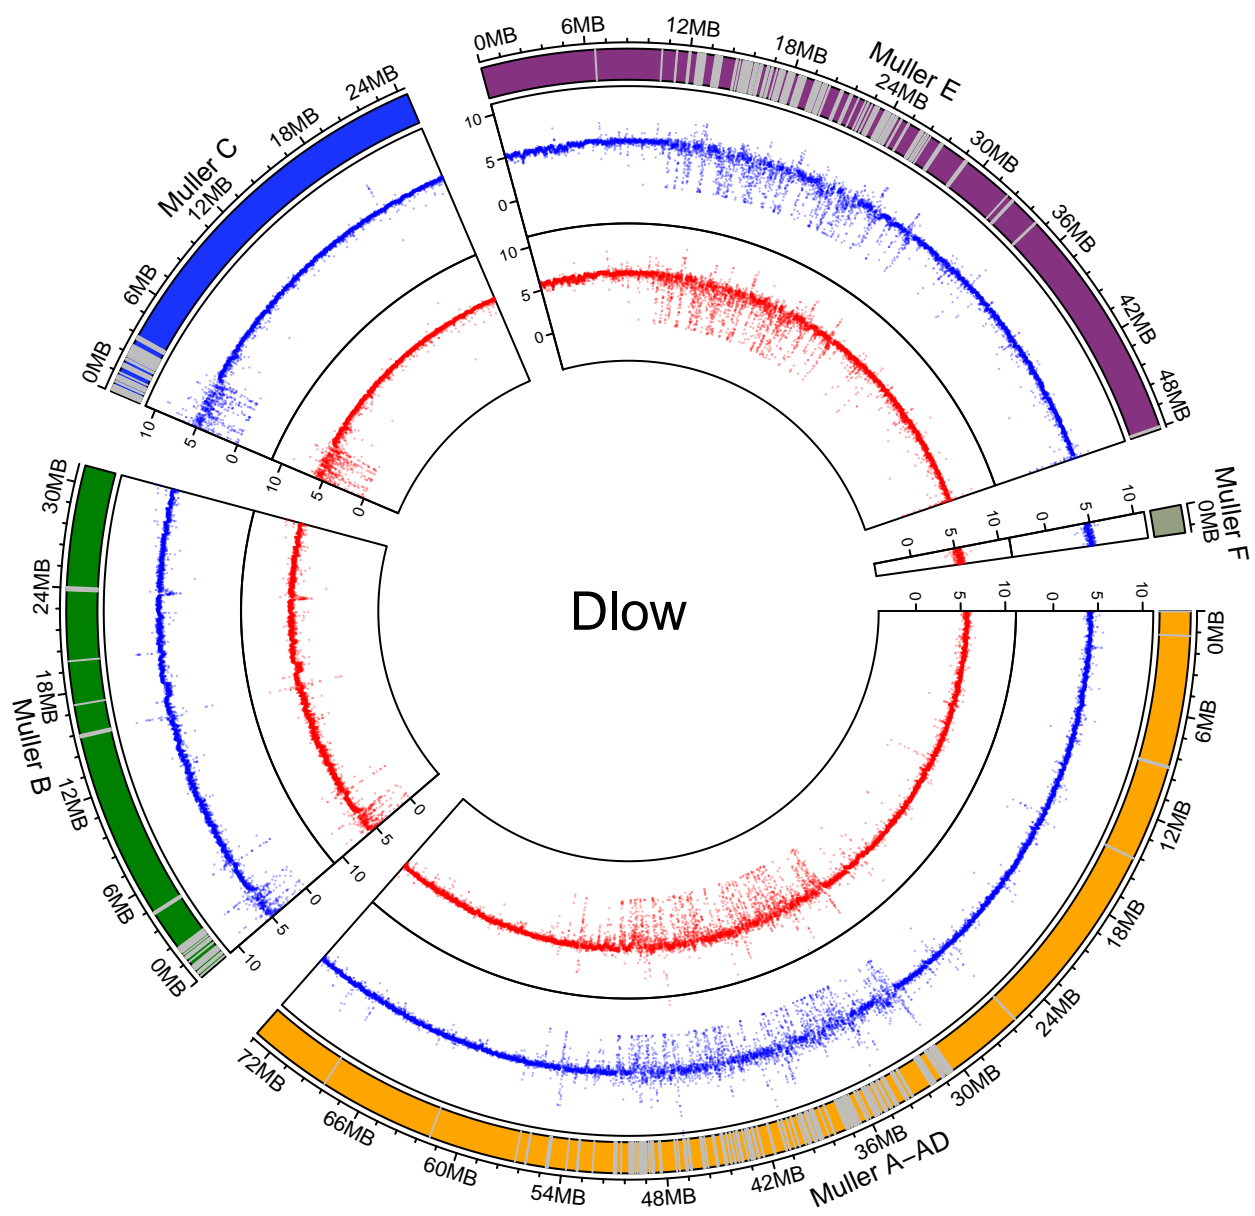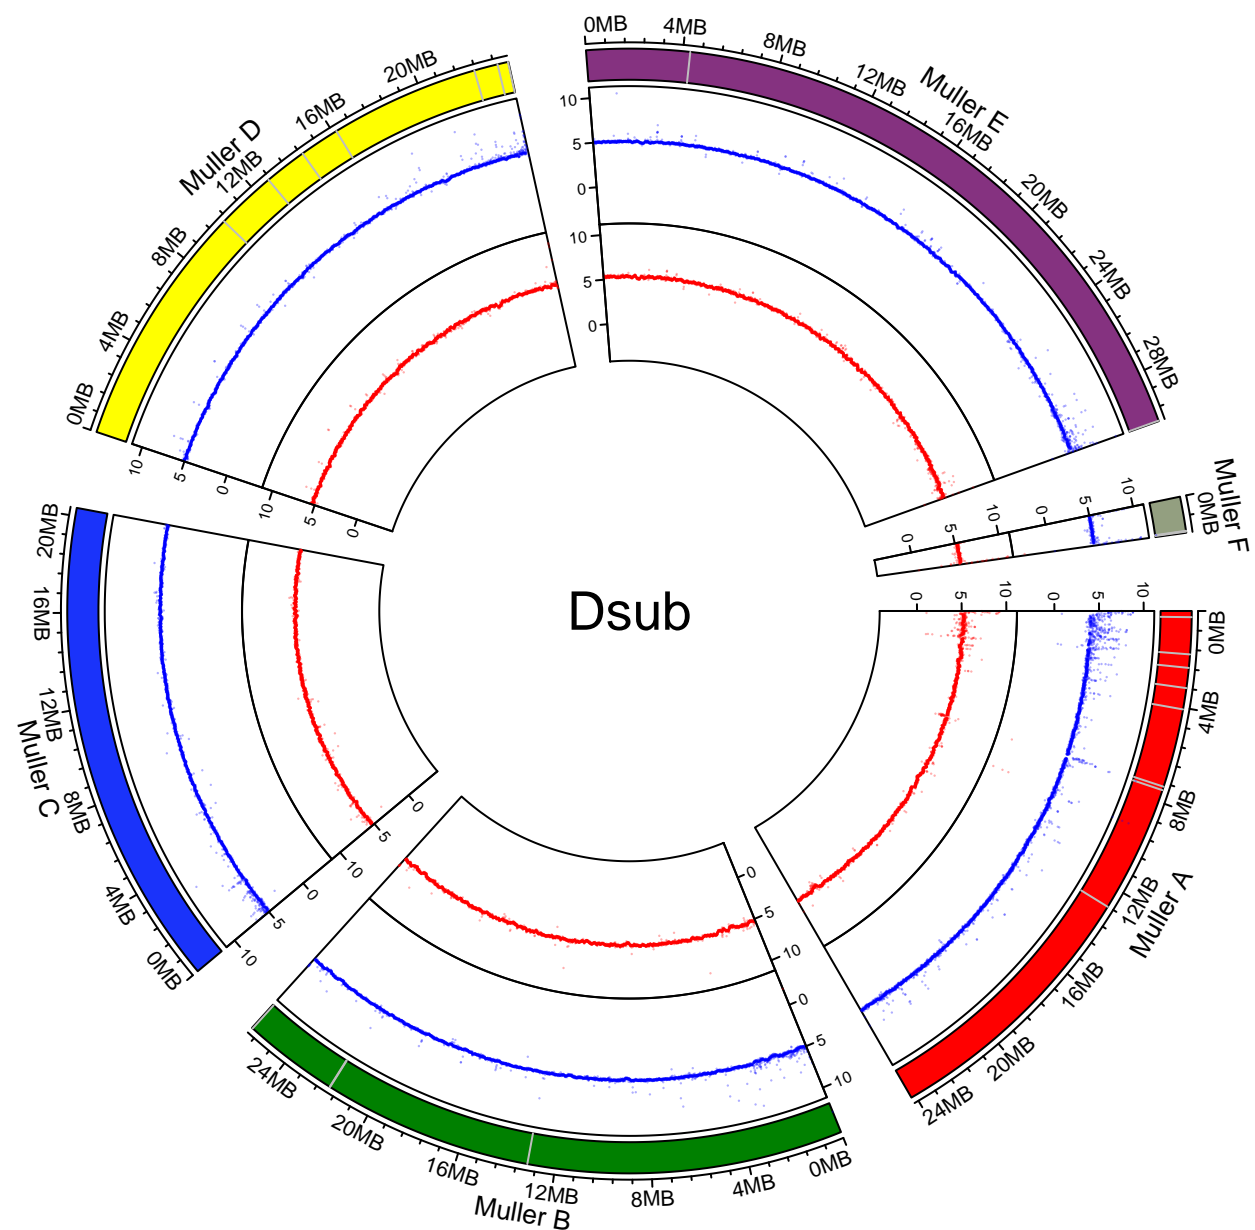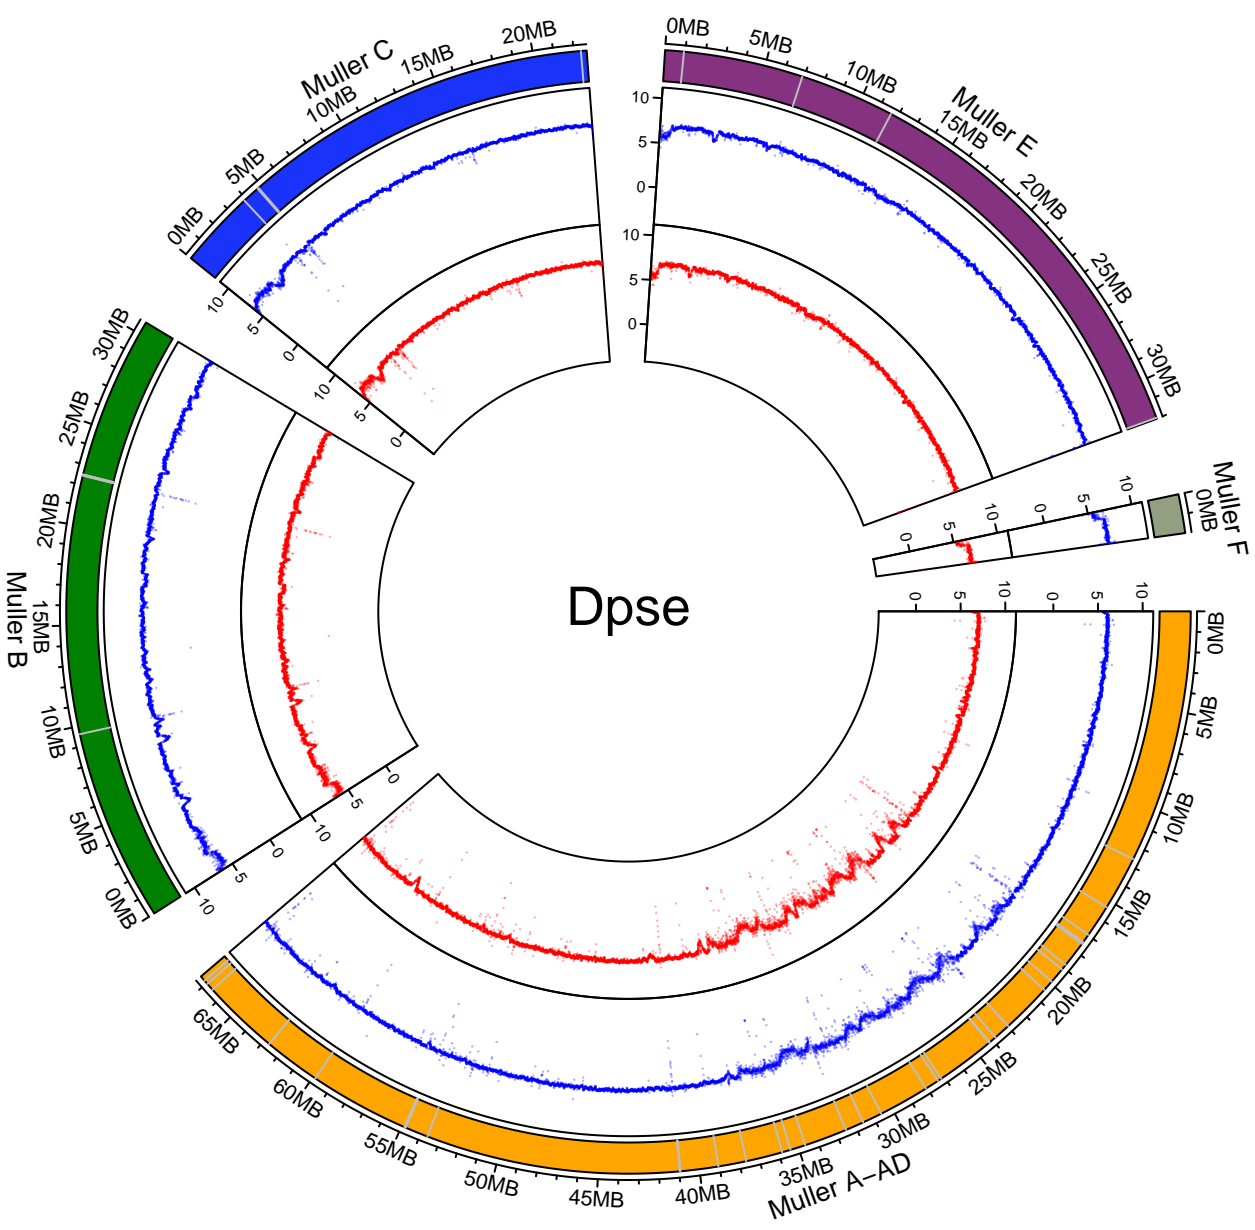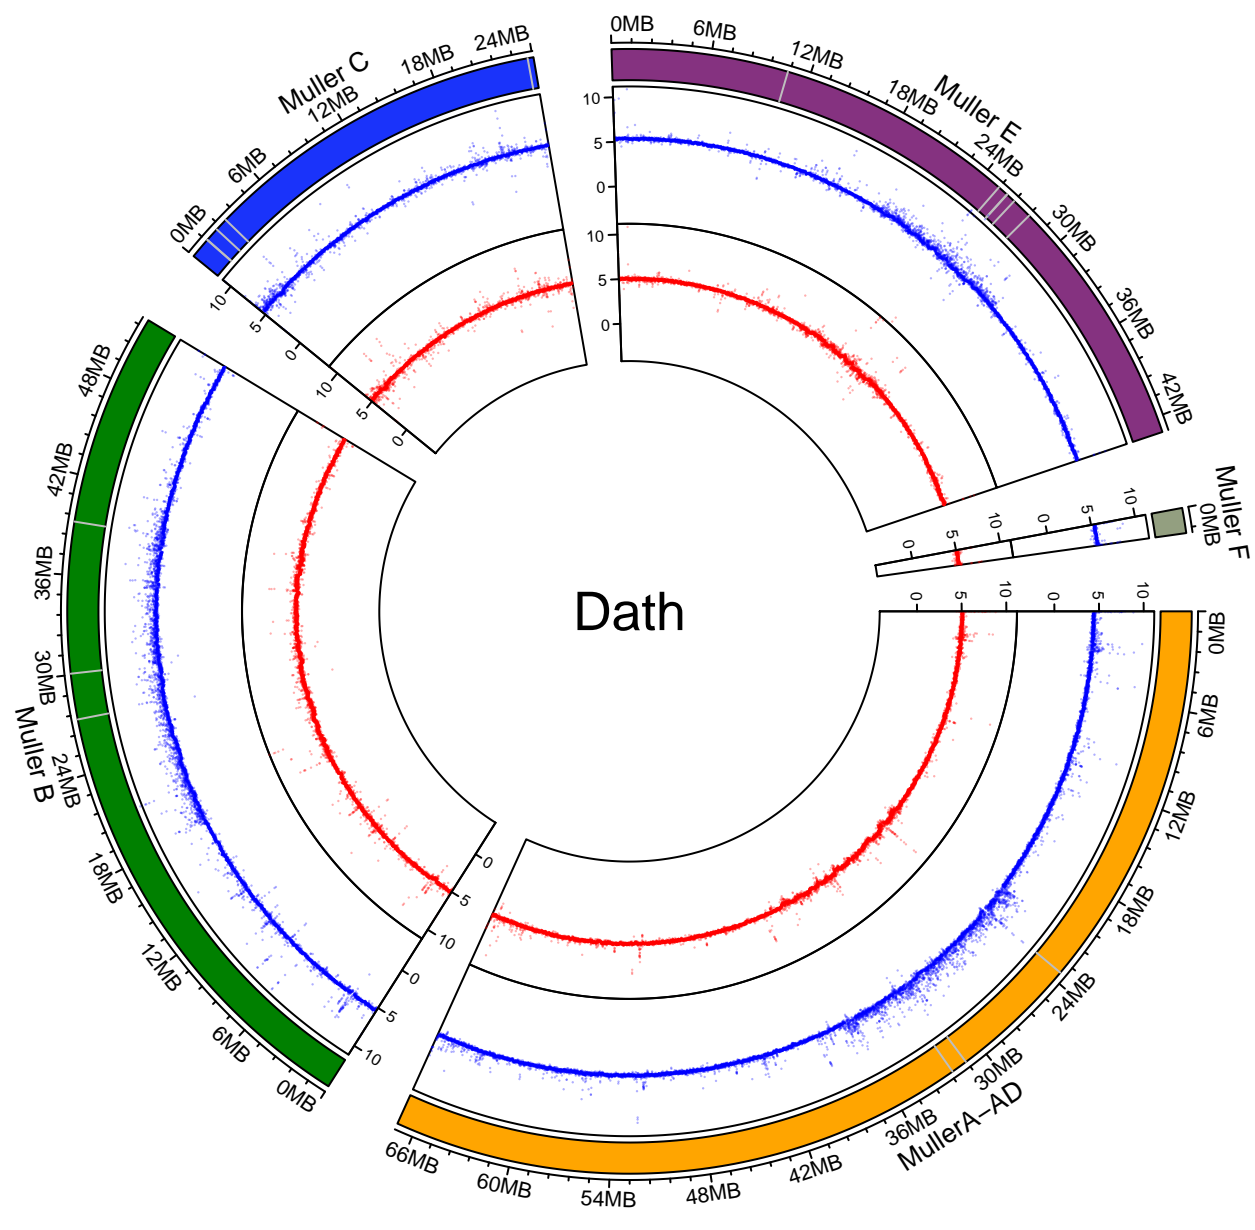

Supplement: supp [file elife-49002-supp-v1.zip › elife_poa_e49002_Figure_2_figure_supplement_1.pdf]

## GENE

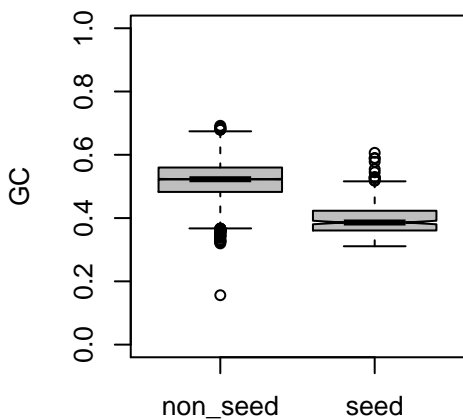

## INTERGENE

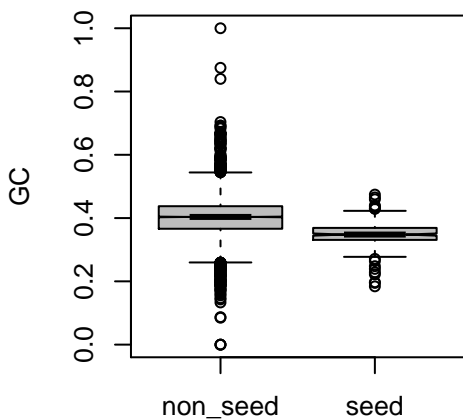

## INTRONS

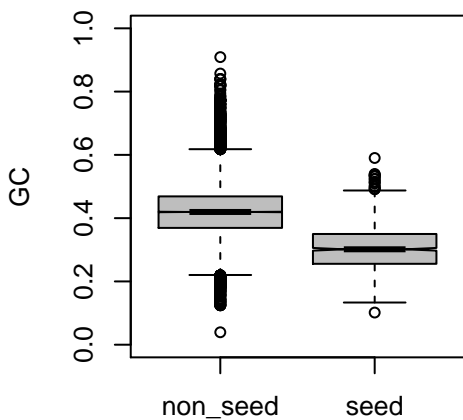

## EXONS

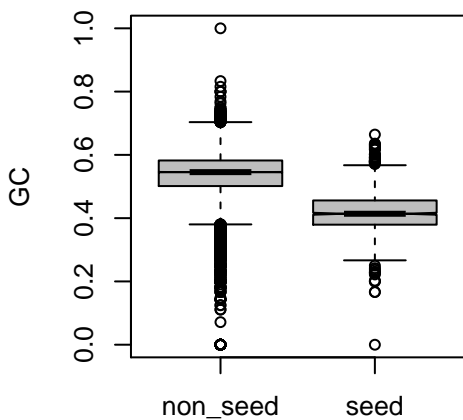

Supplement: supp [file elife-49002-supp-v1.zip › elife_poa_e49002_Figure_5_figure_supplement_3.pdf]

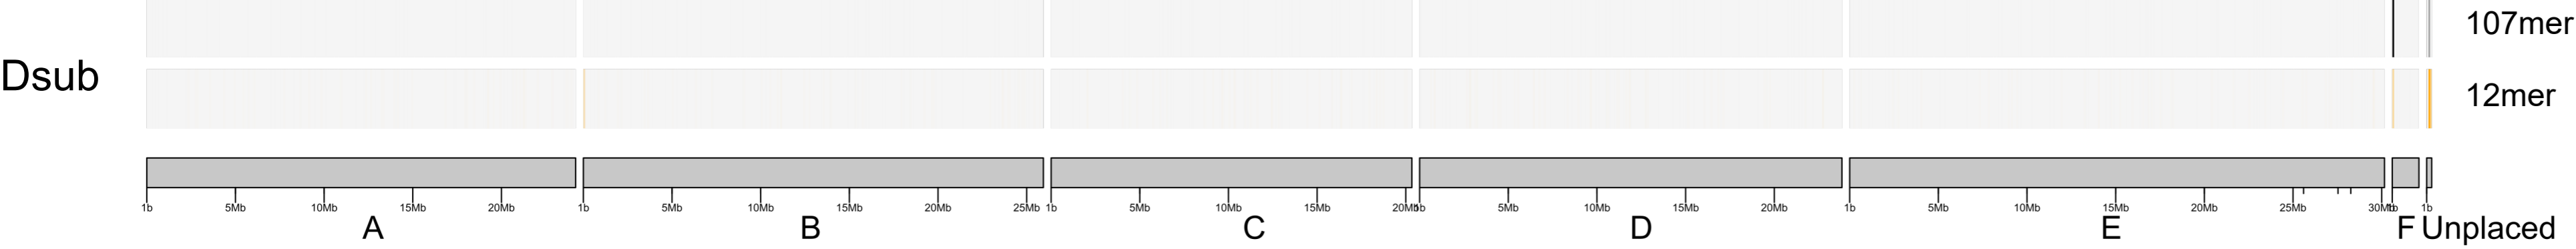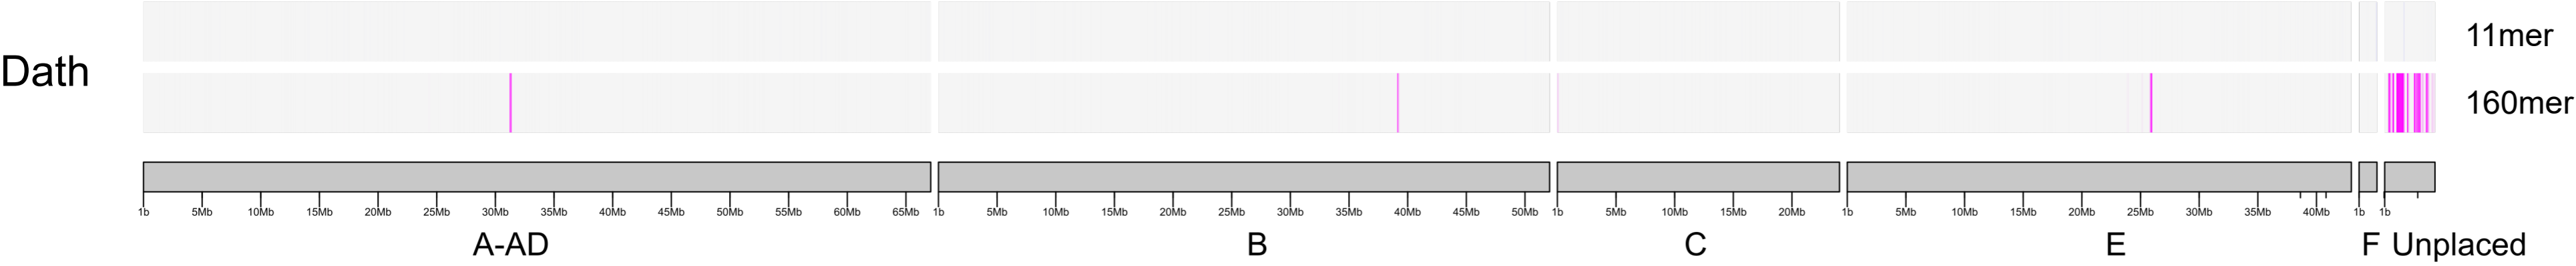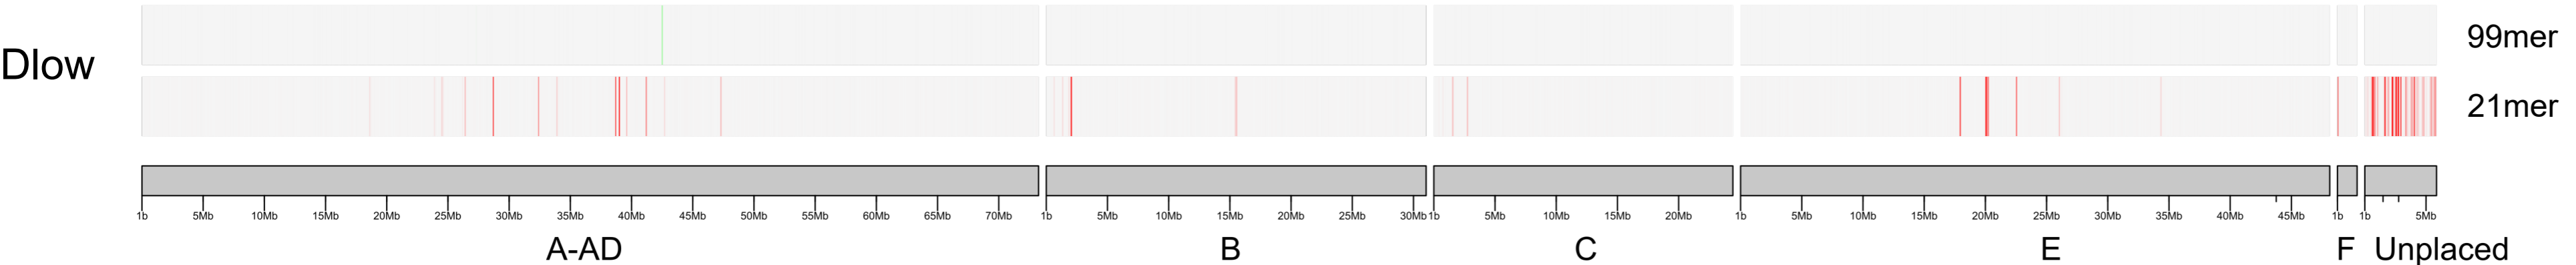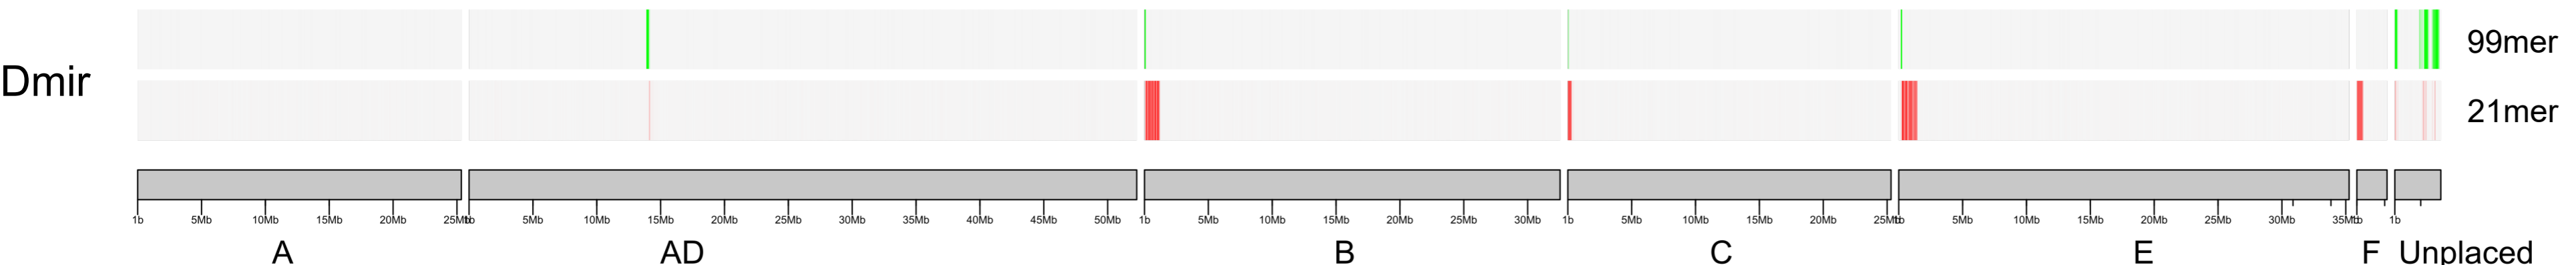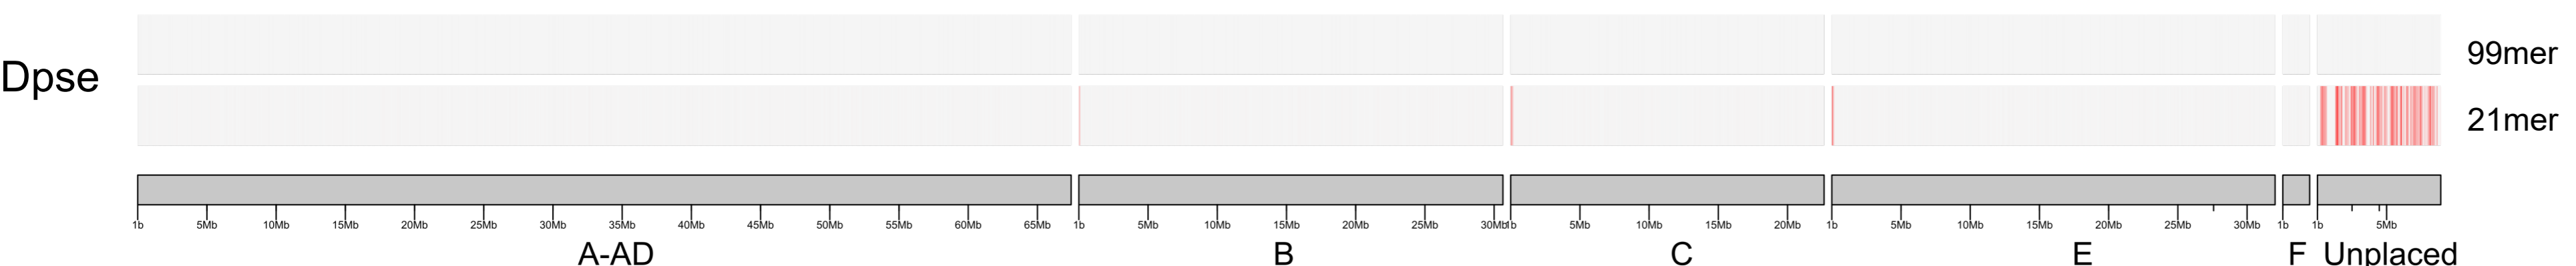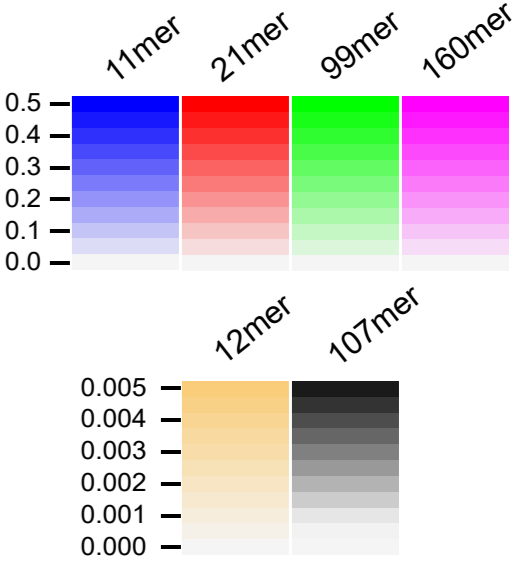

Supplement: supp [file elife-49002-supp-v1.zip › elife_poa_e49002_Figure_4_figure_supplement_1.pdf]

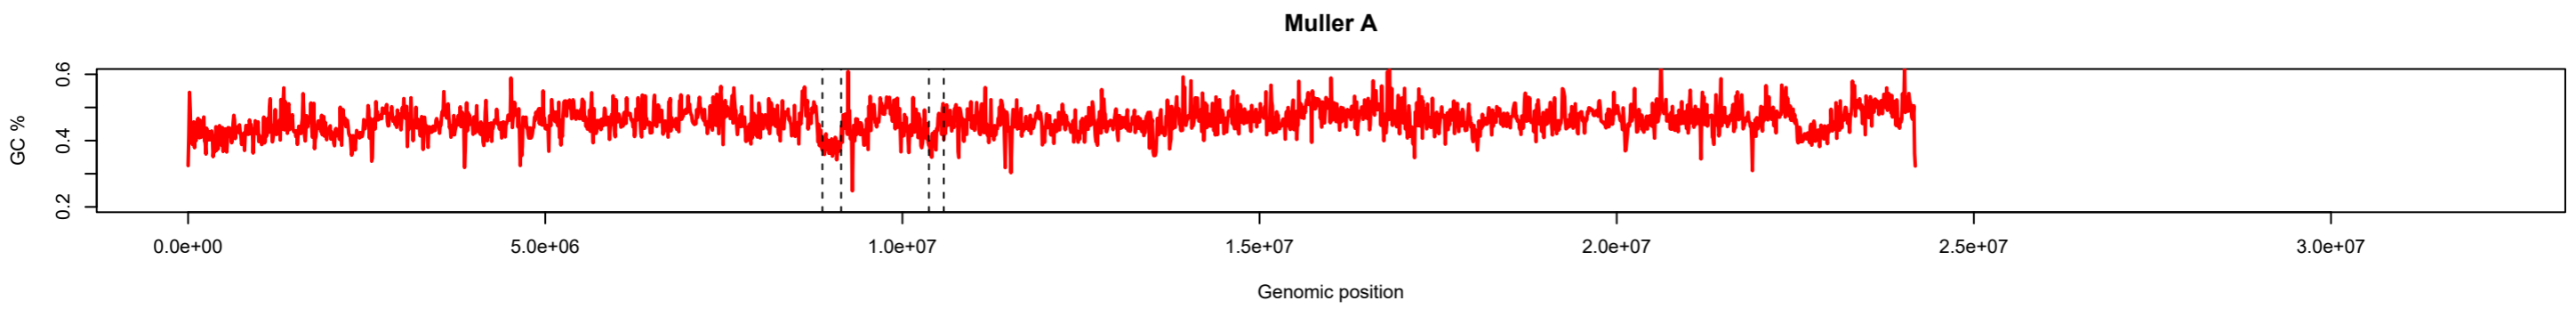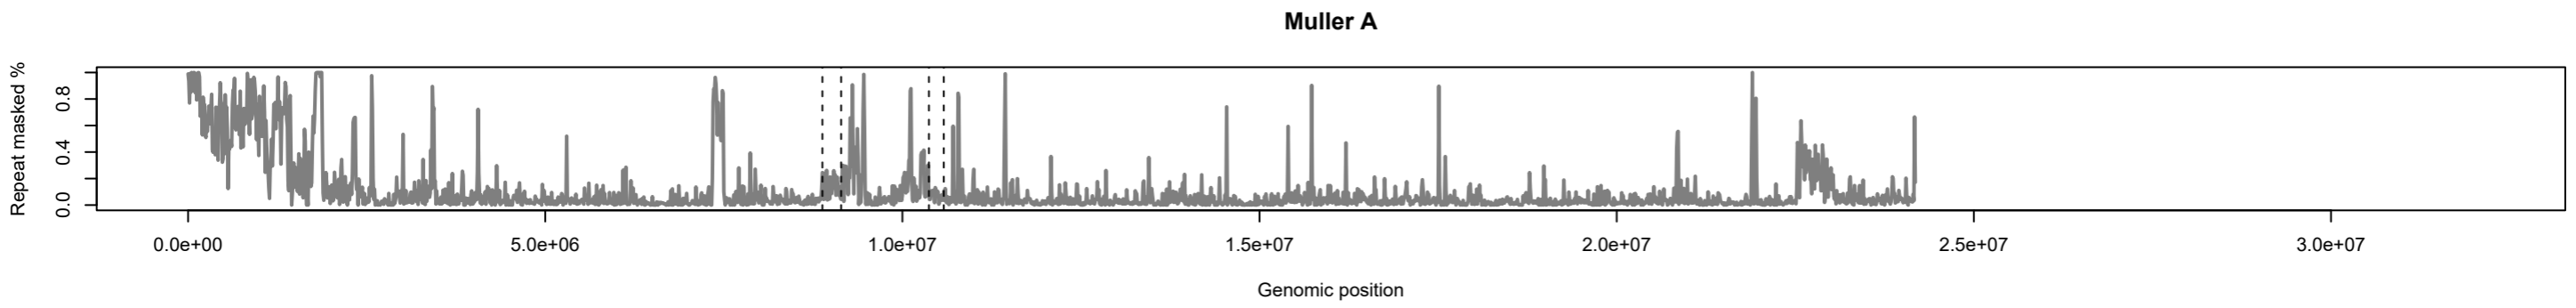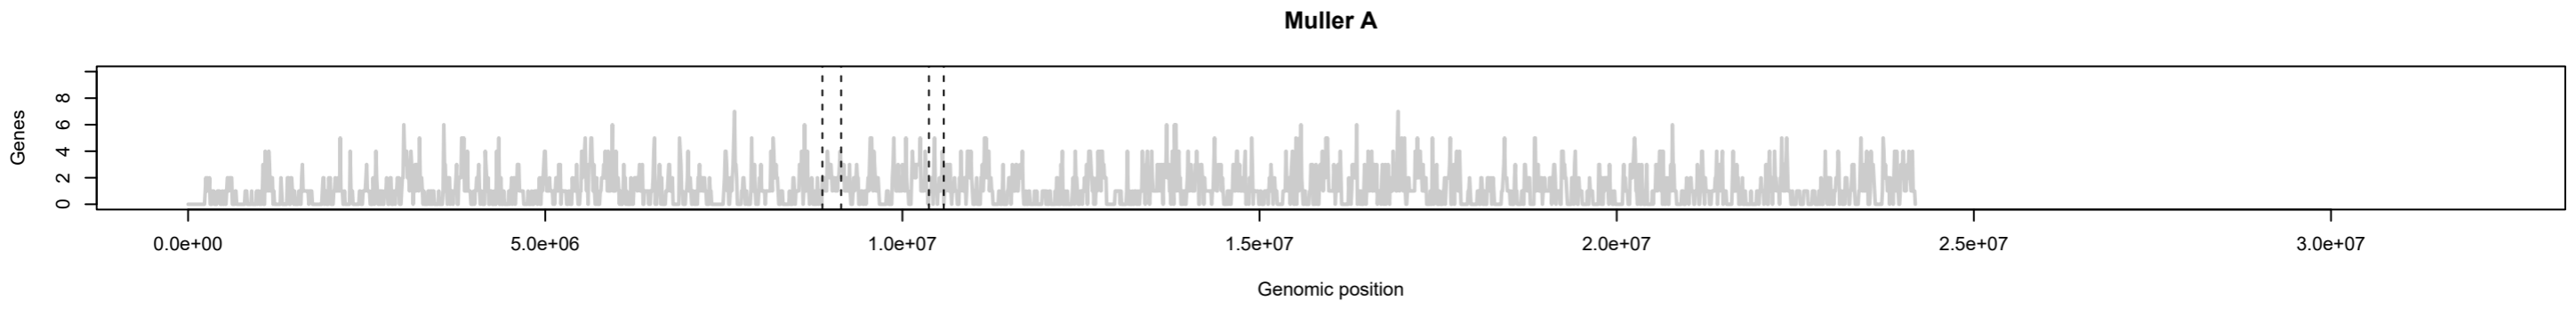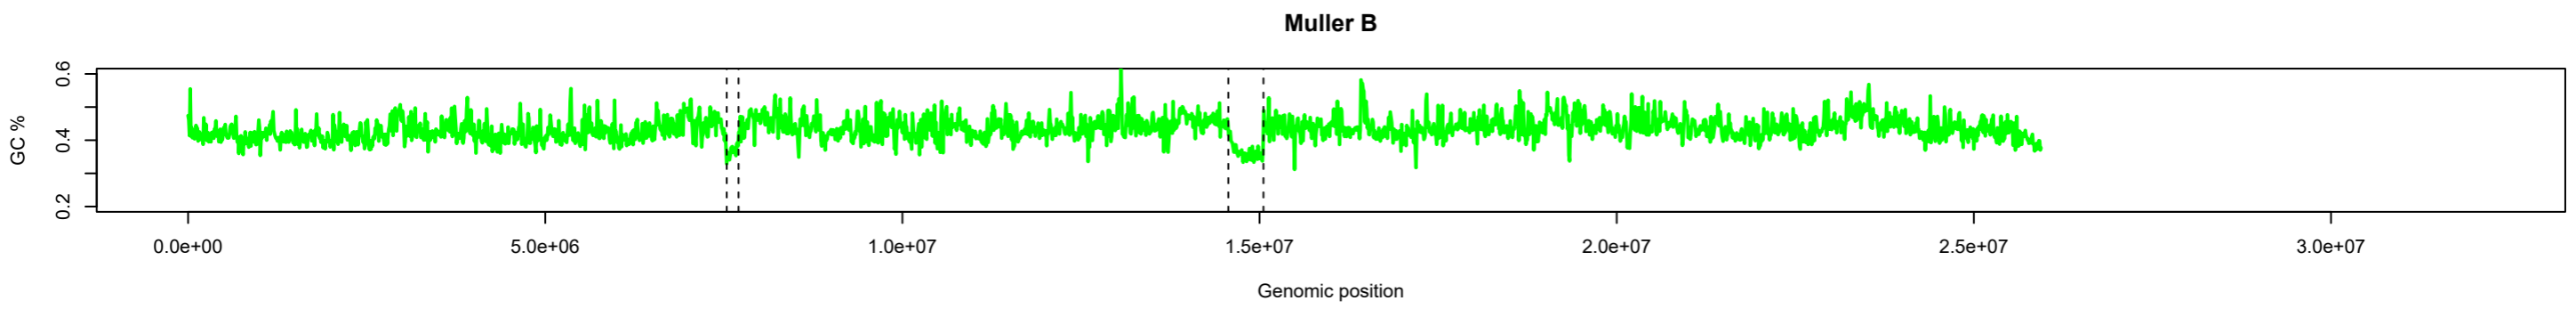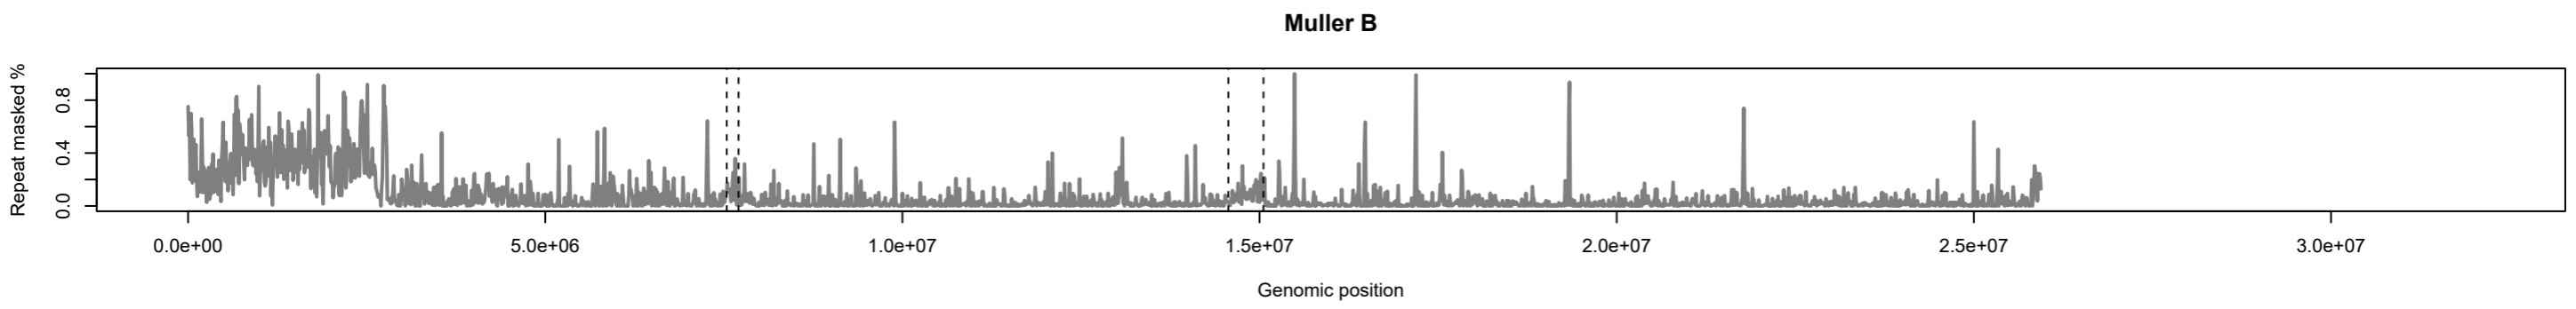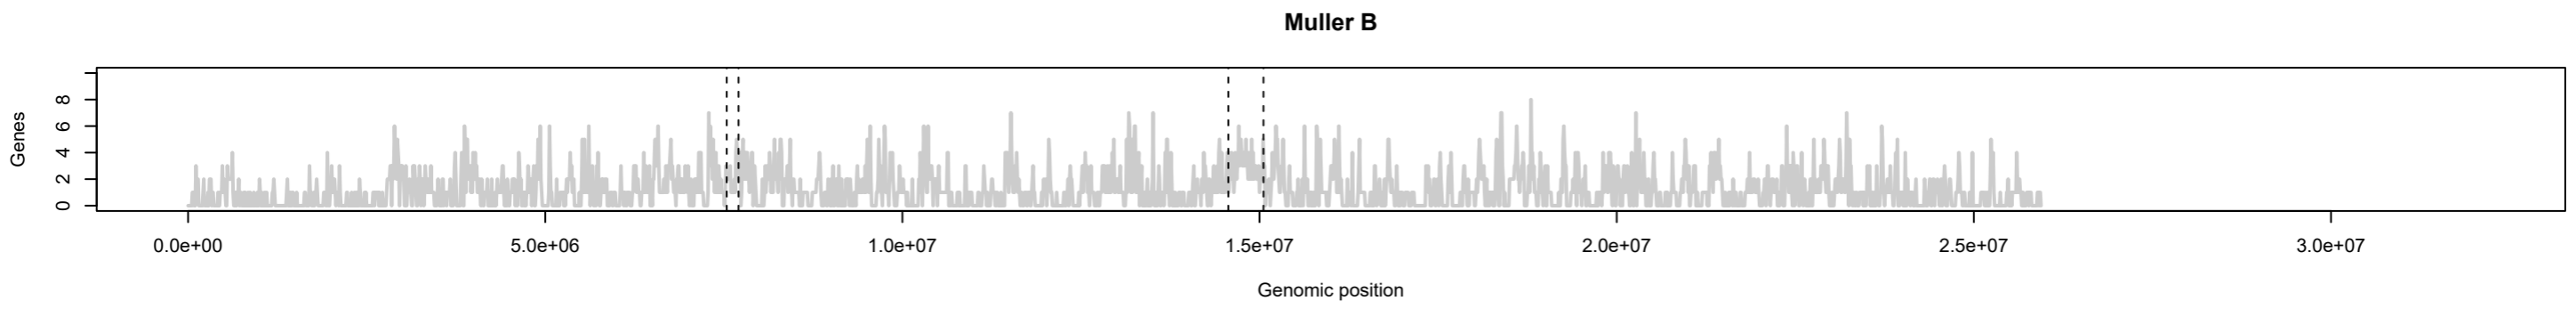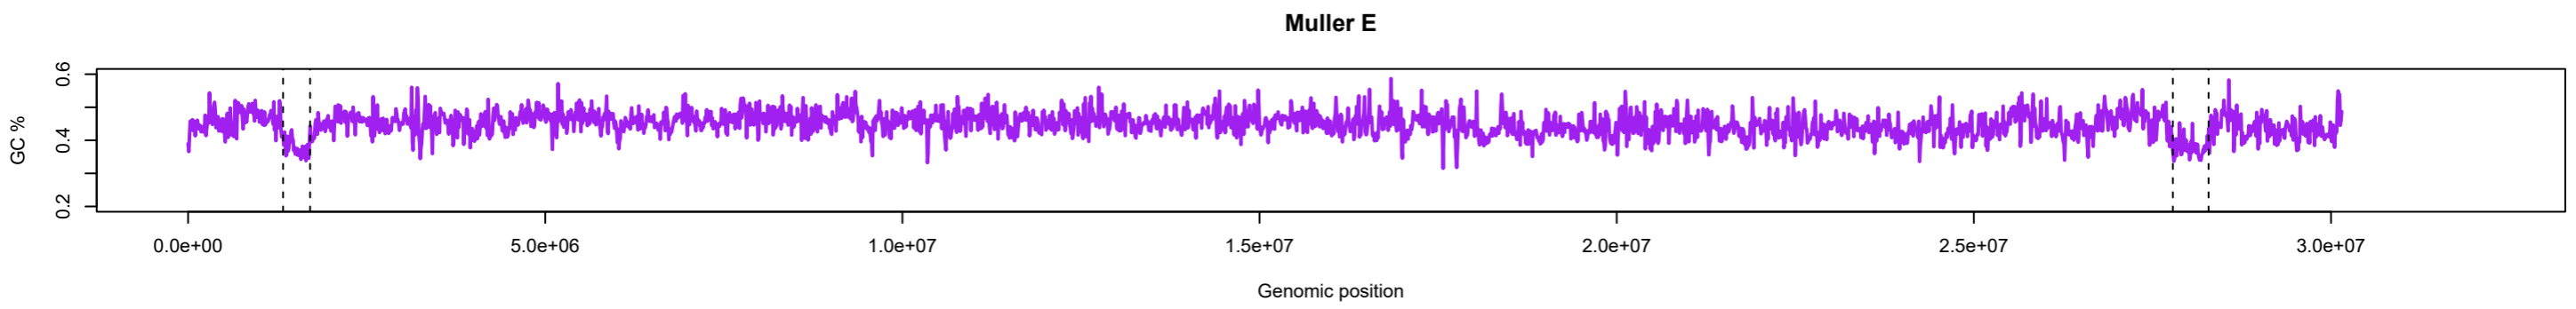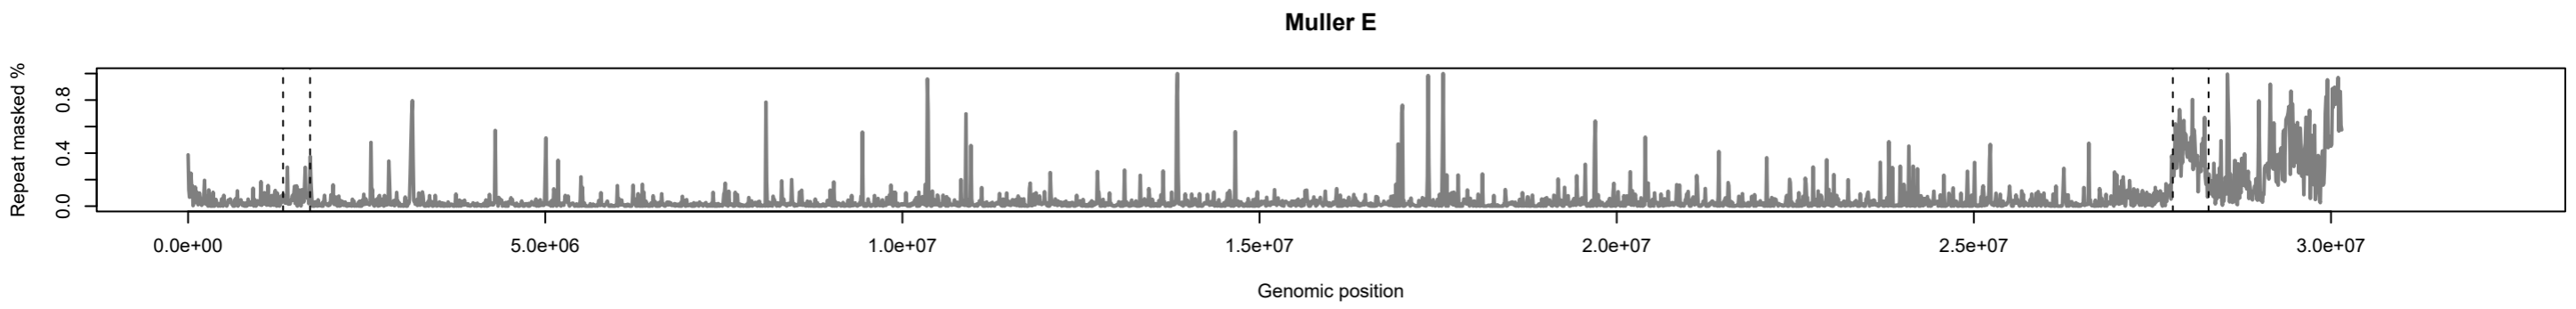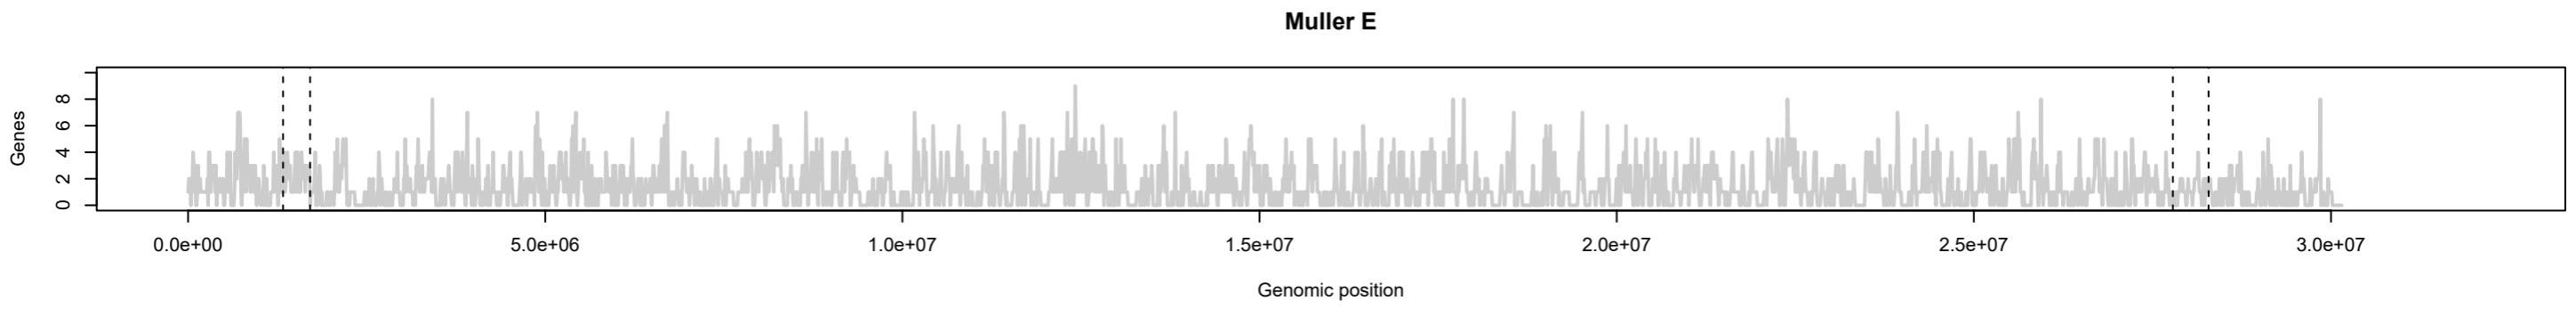

Supplement: supp [file elife-49002-supp-v1.zip › elife_poa_e49002_Figure_5_figure_supplement_2.pdf]

A

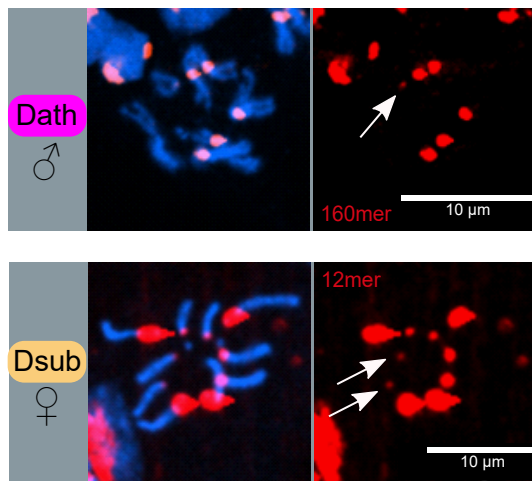

B

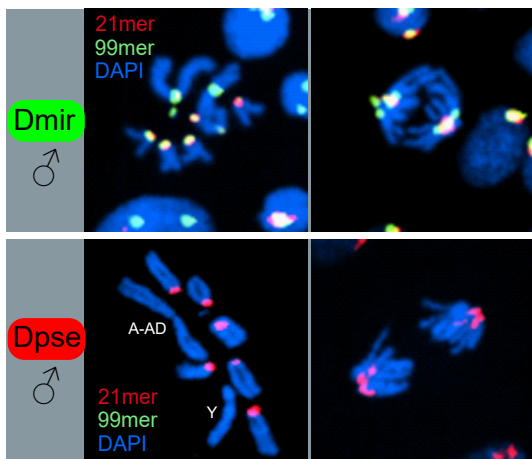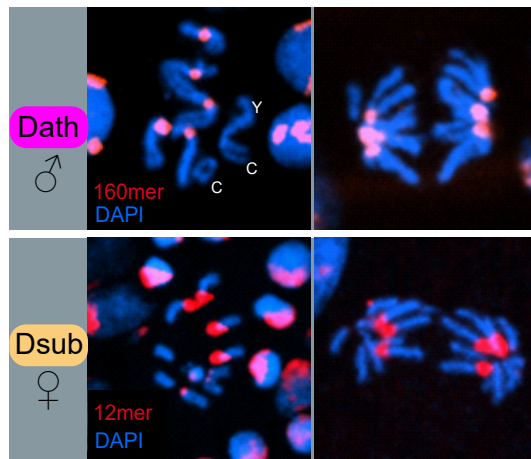

Supplement: supp [file elife-49002-supp-v1.zip › elife_poa_e49002_Figure_4_figure_supplement_4.pdf]

Dsub vs Dsub

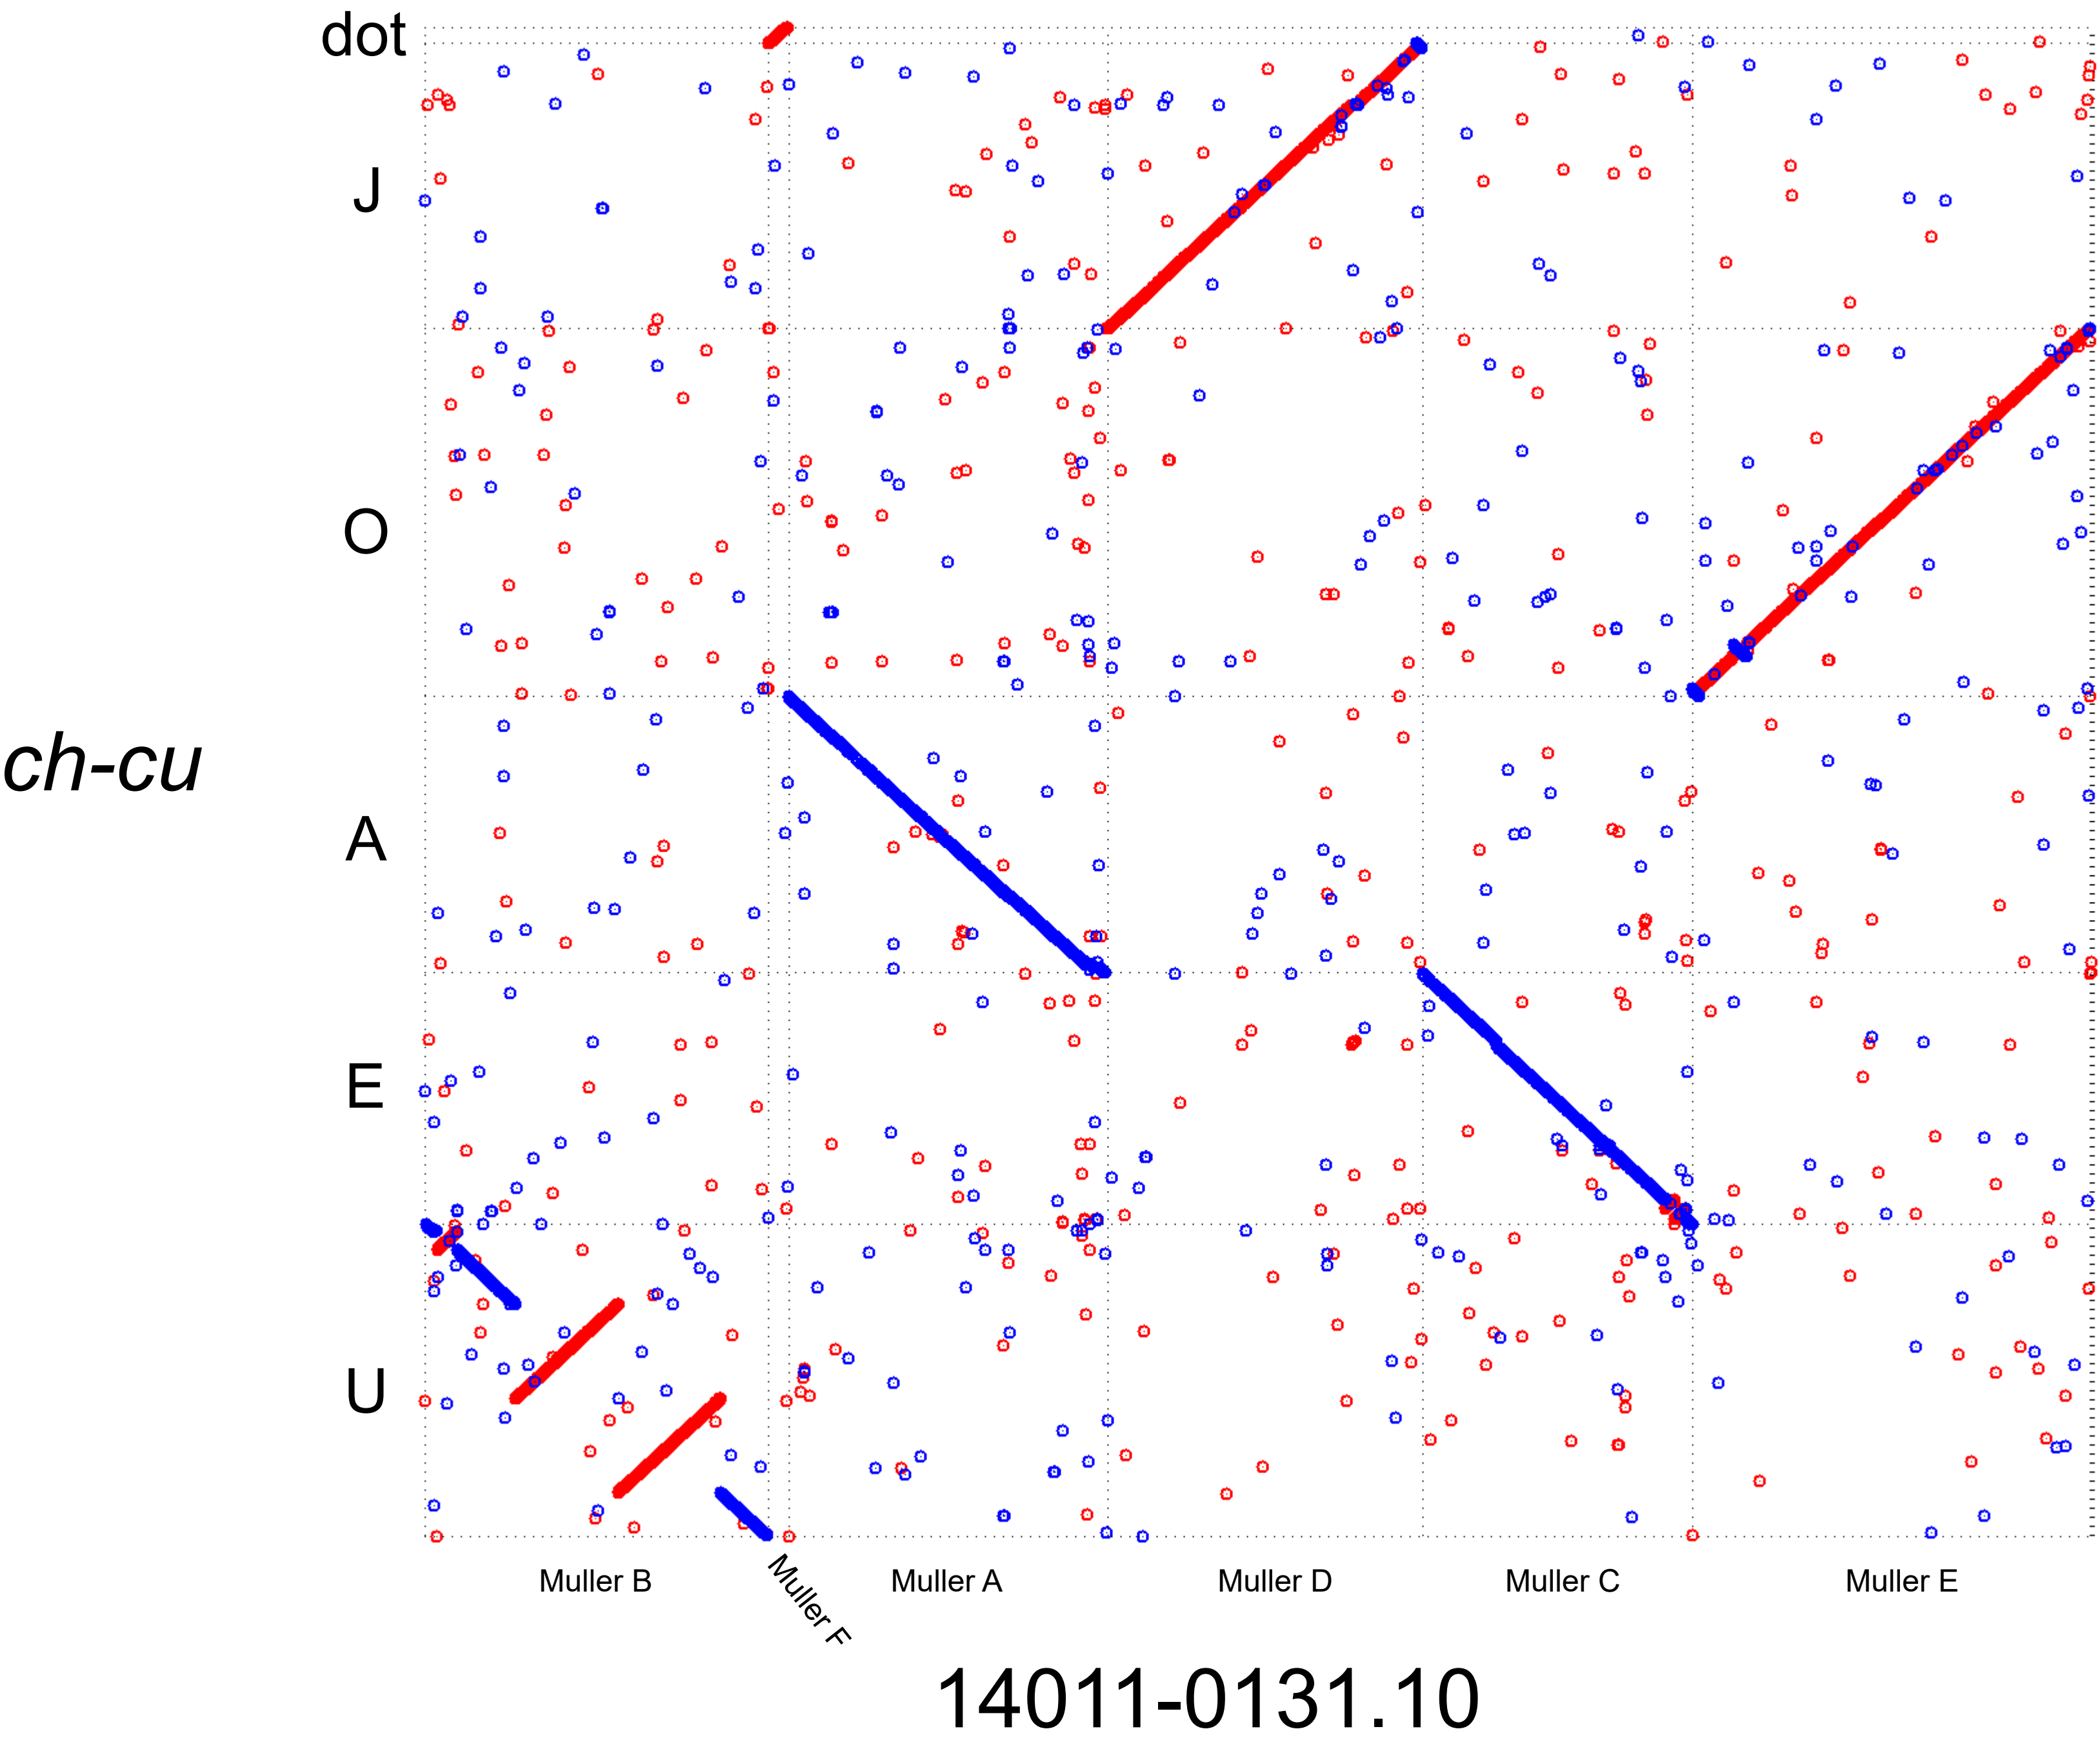

Dsub vs Dgua

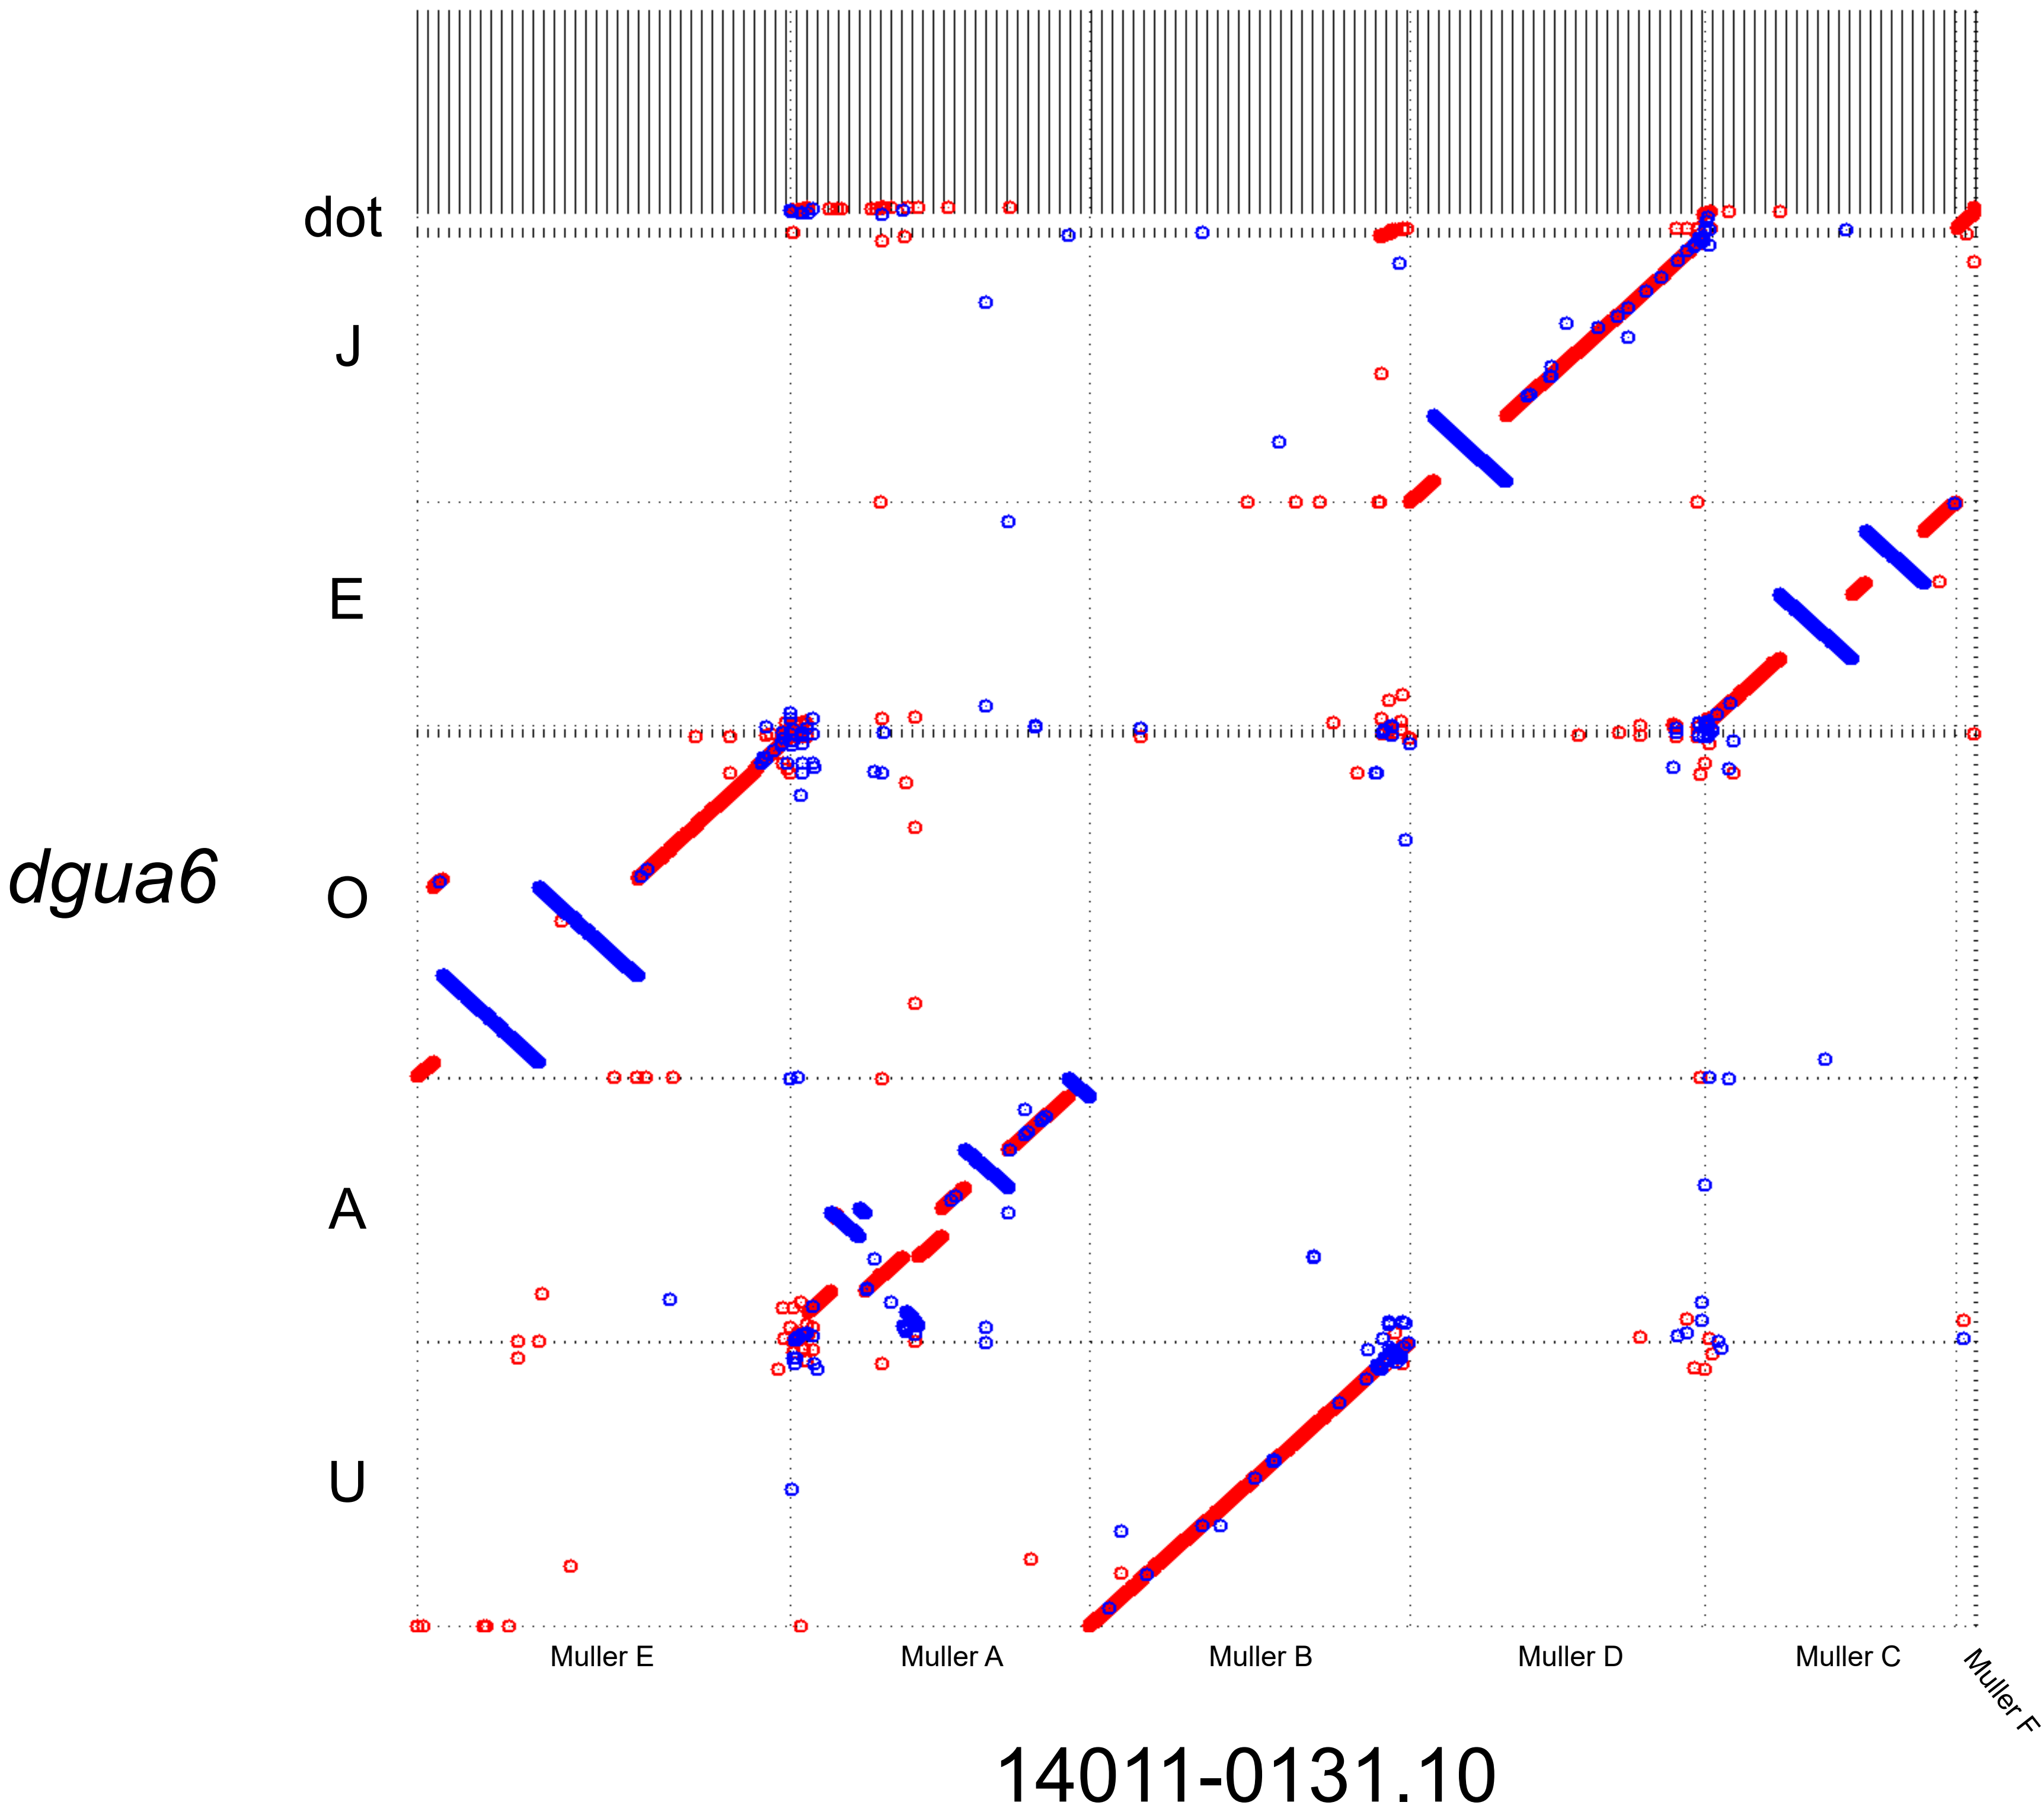

Supplement: supp [file elife-49002-supp-v1.zip › elife_poa_e49002_Figure_3_figure_supplement_1.pdf]

Dsub

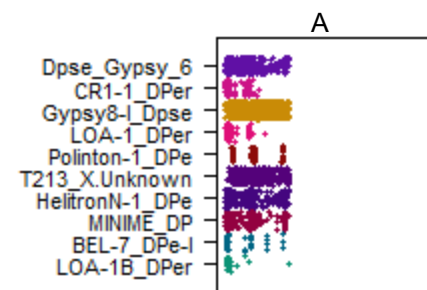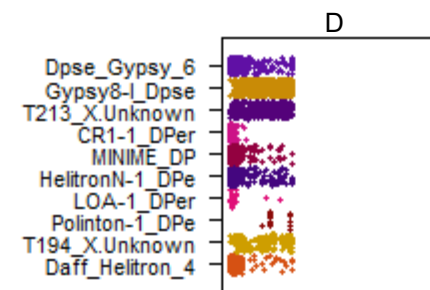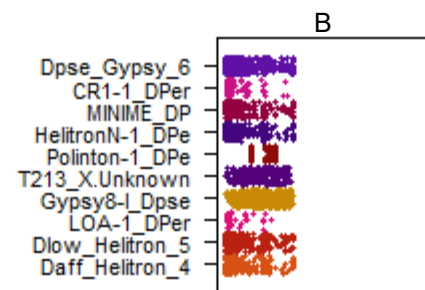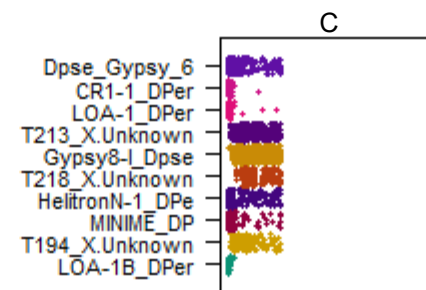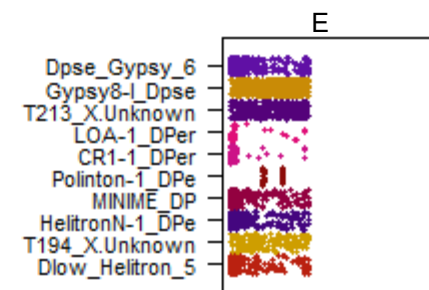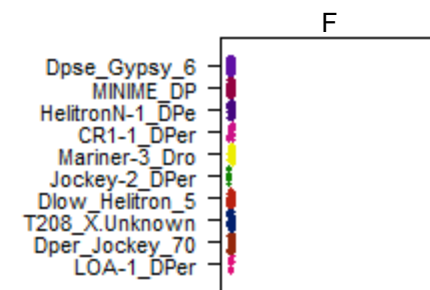

Dath

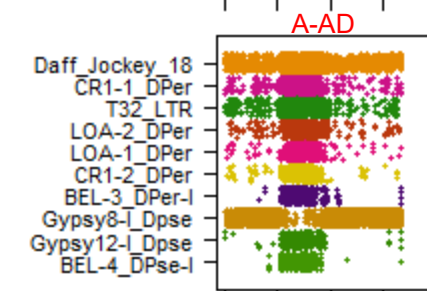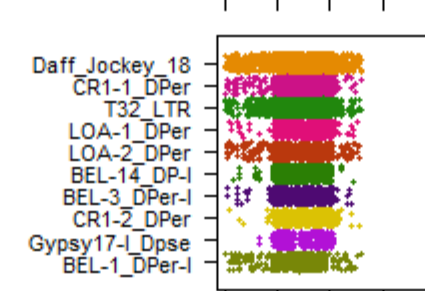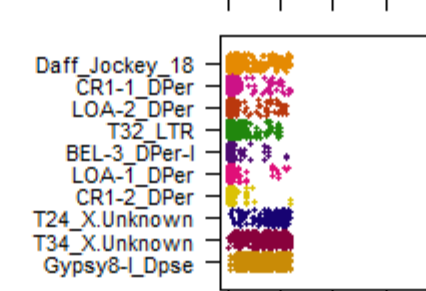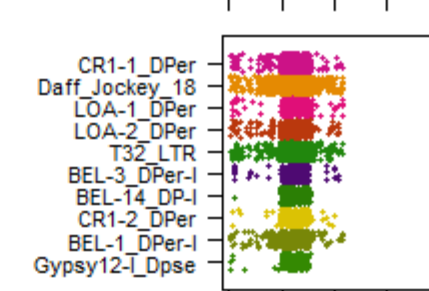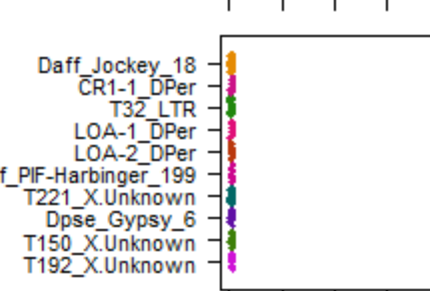

Dlow

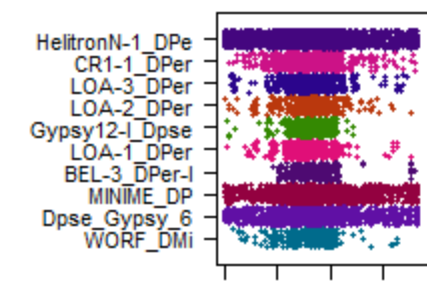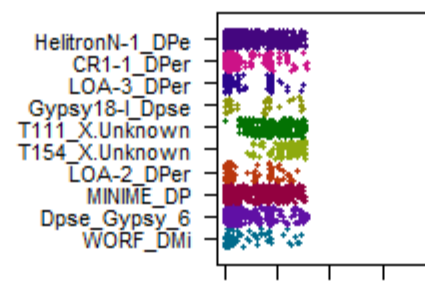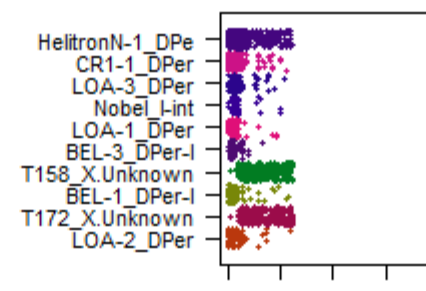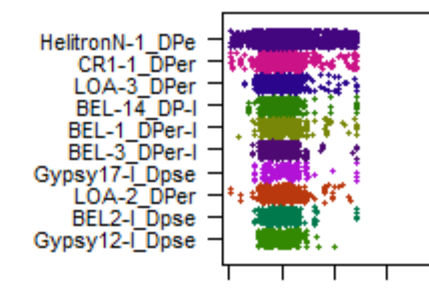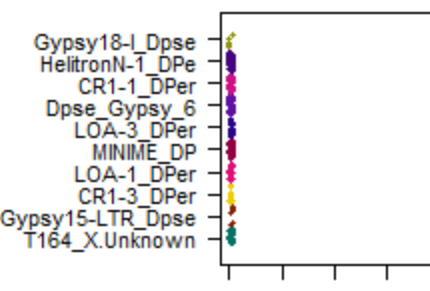

Dpse

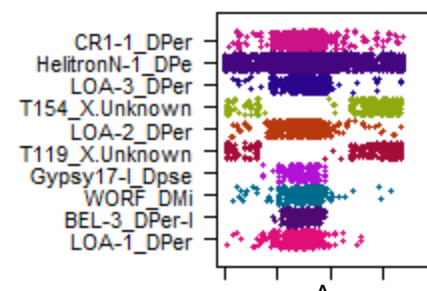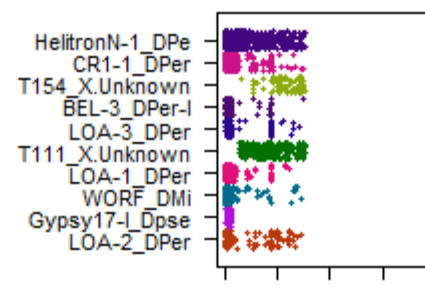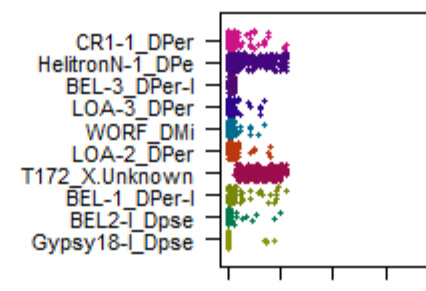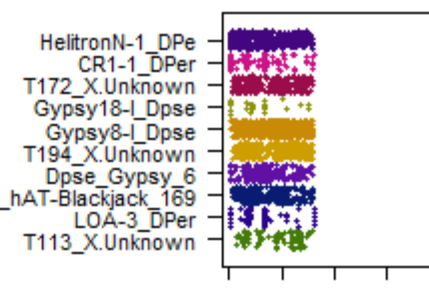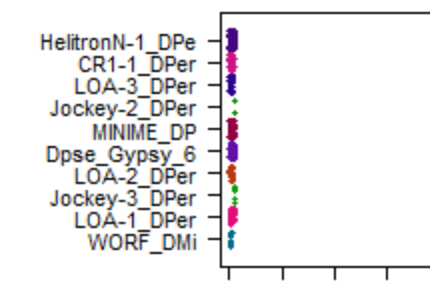

Dmir

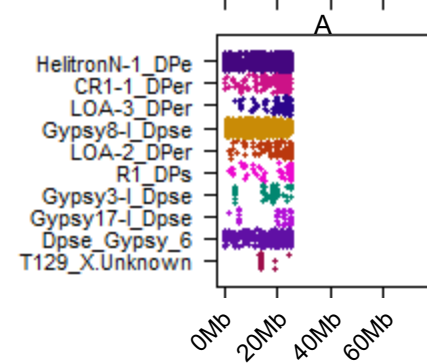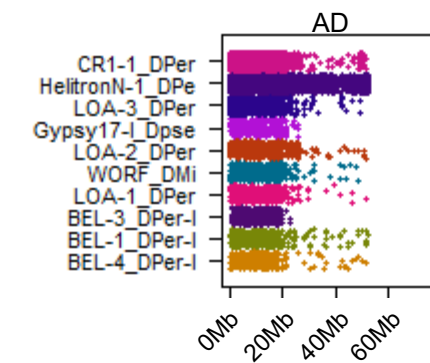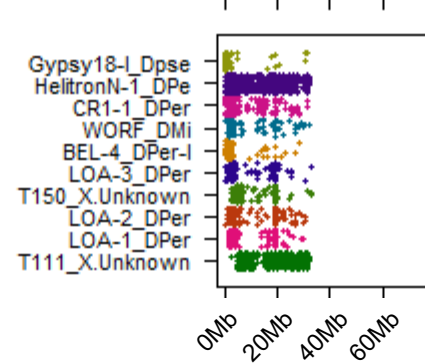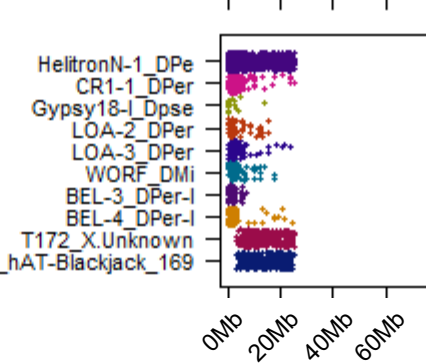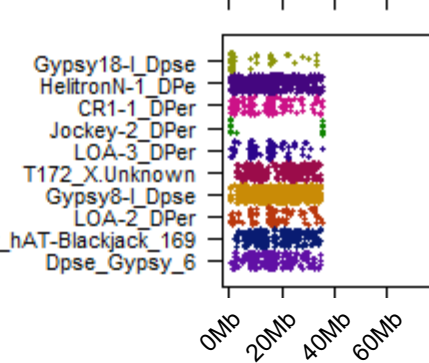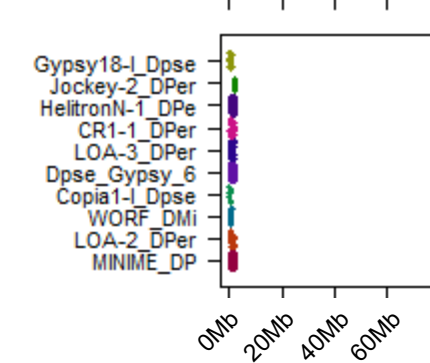

Supplement: supp [file elife-49002-supp-v1.zip › elife_poa_e49002_Figure_8_figure_supplement_1.pdf]

# Muller A

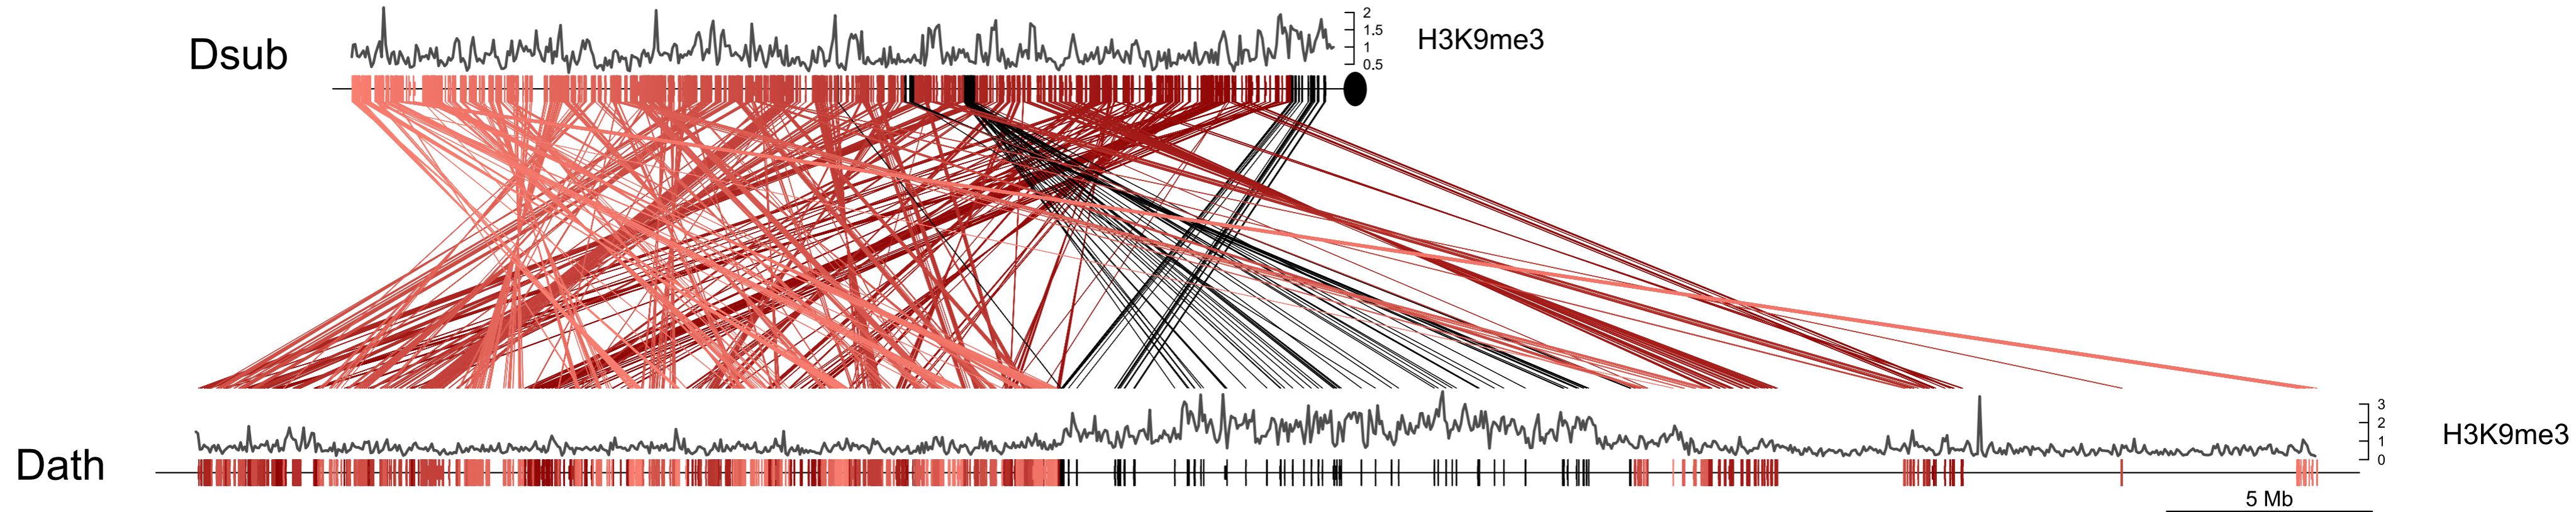

Supplement: supp [file elife-49002-supp-v1.zip › elife_poa_e49002_Figure_5_figure_supplement_1.pdf]

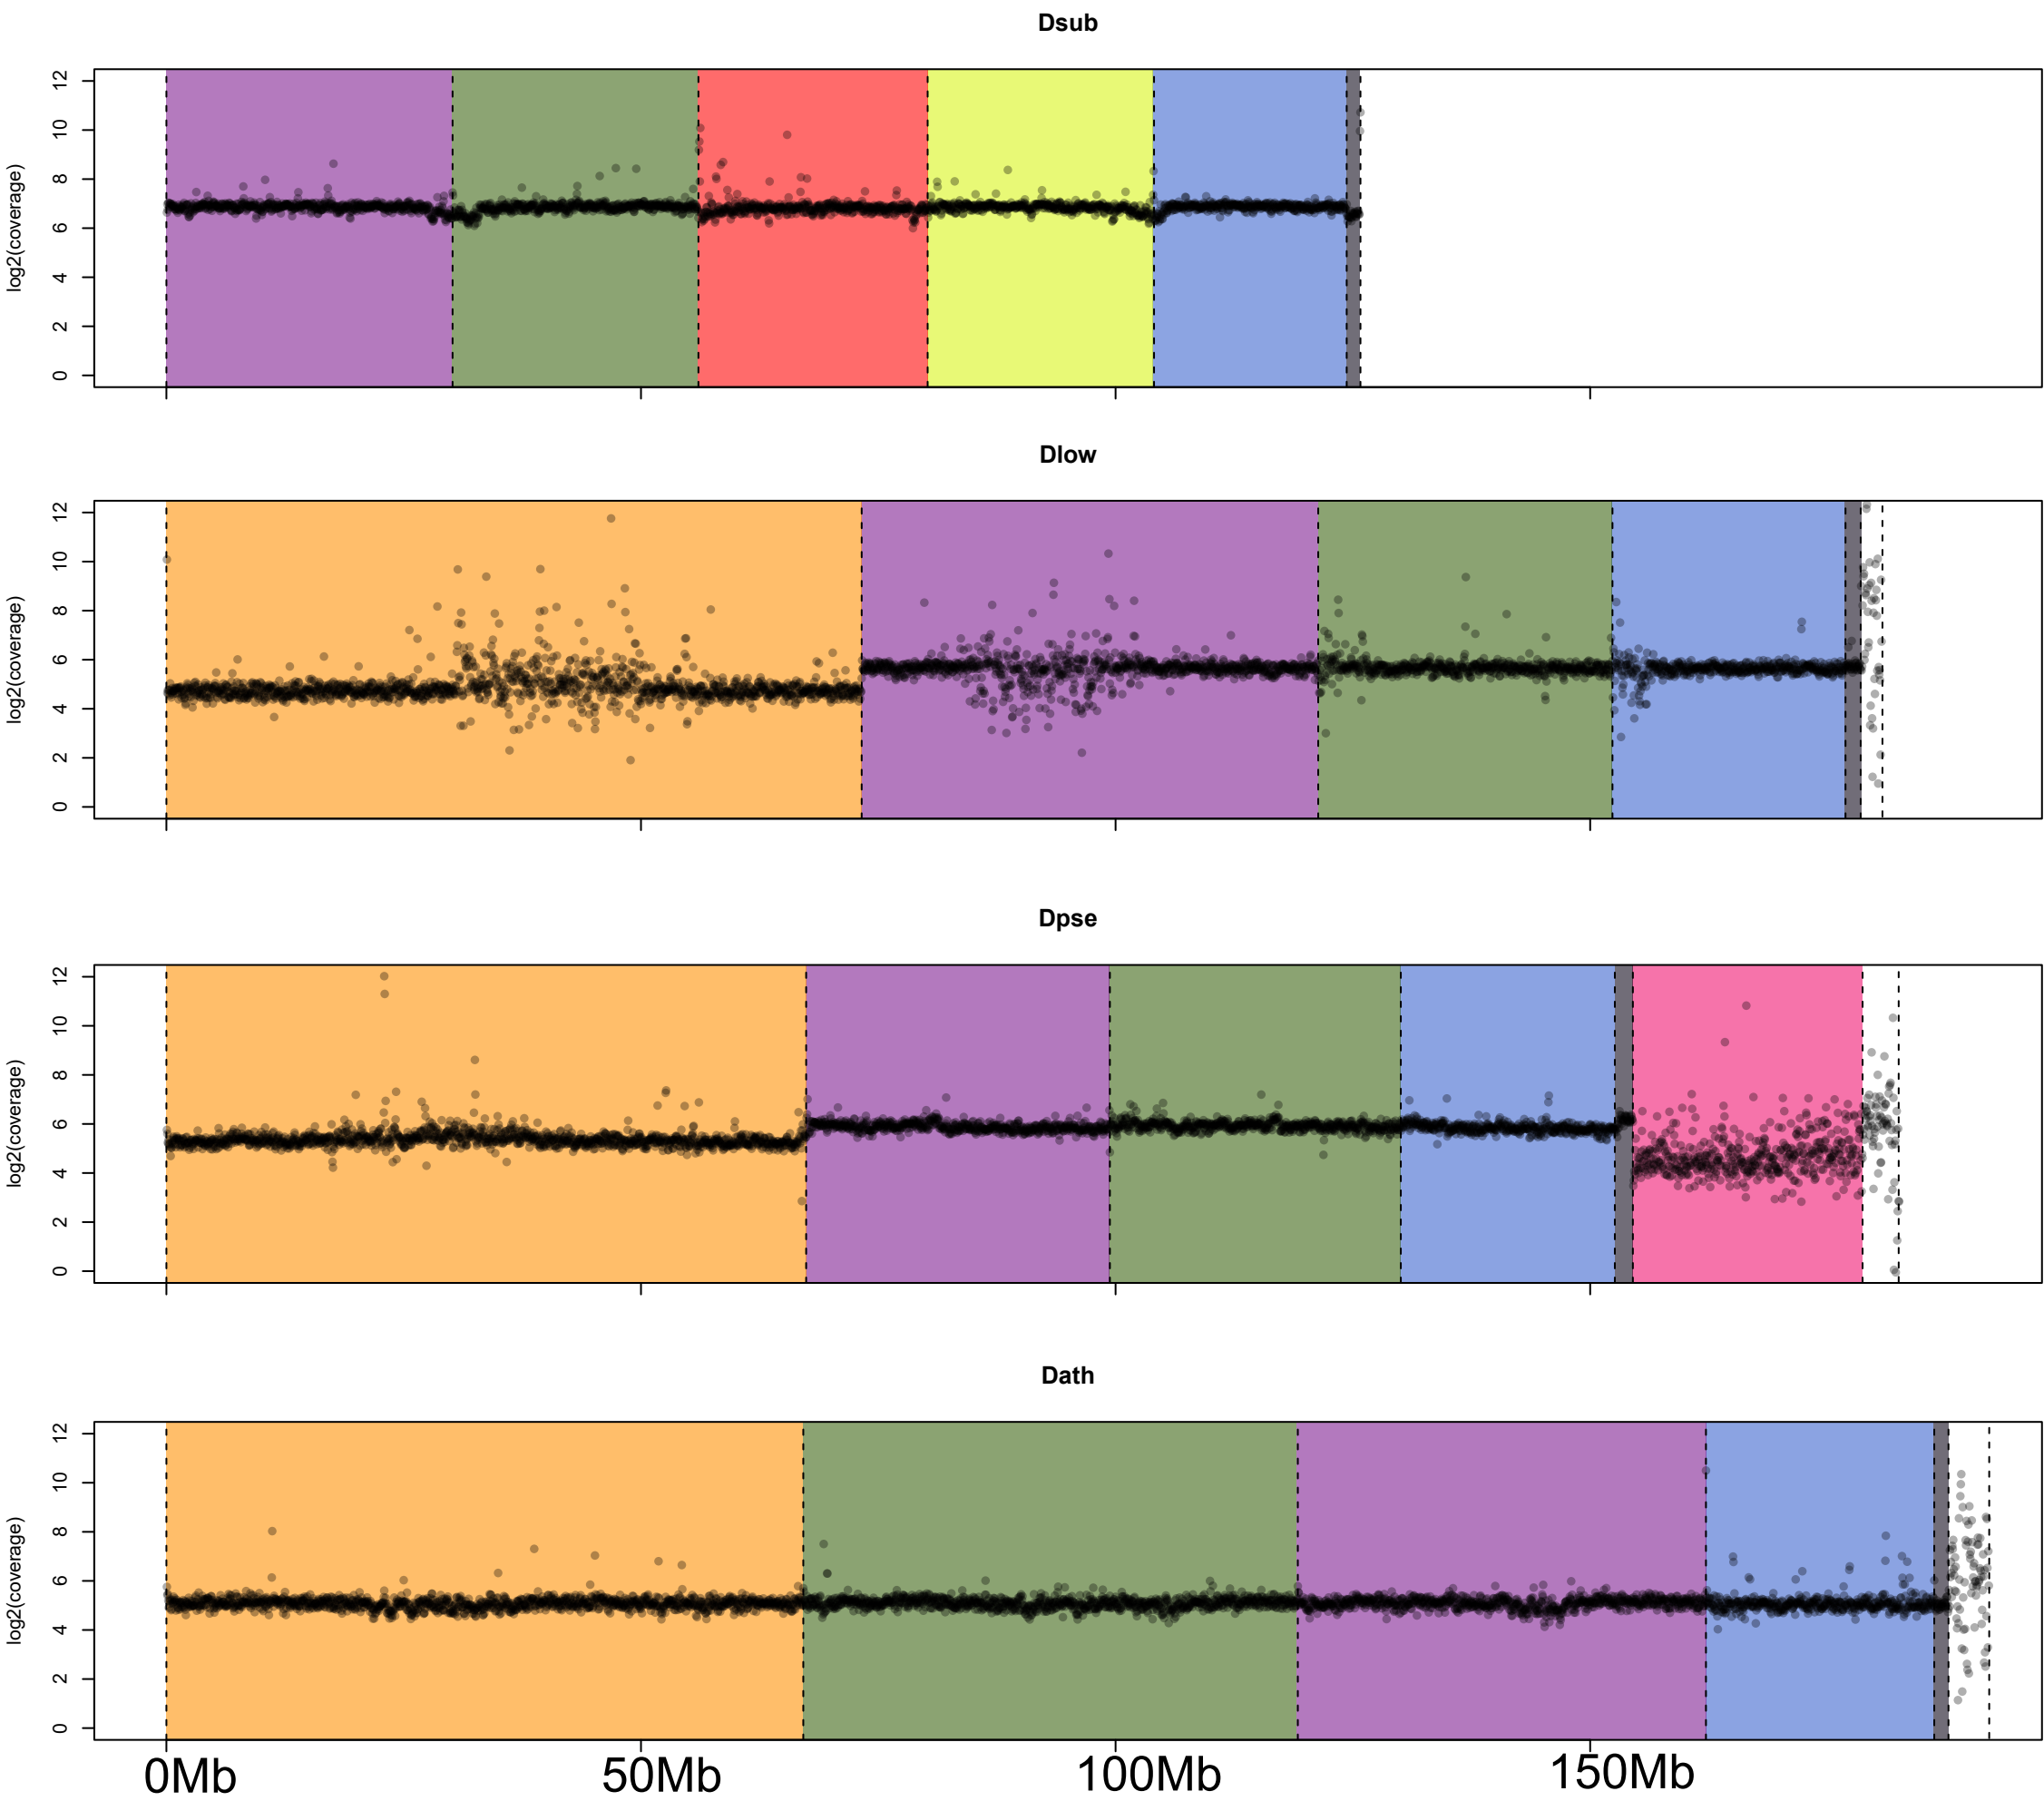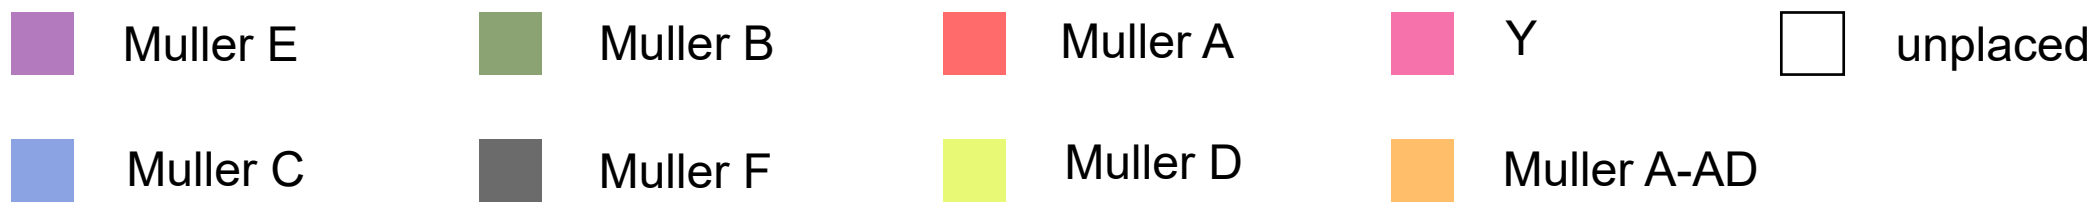

Supplement: supp [file elife-49002-supp-v1.zip › elife_poa_e49002_Figure_2_figure_supplement_2.pdf]

**Dmir**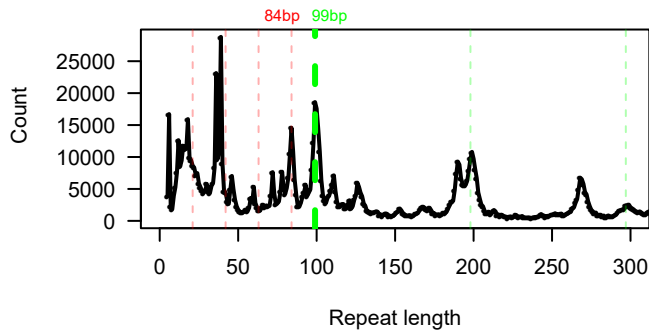**Dpse**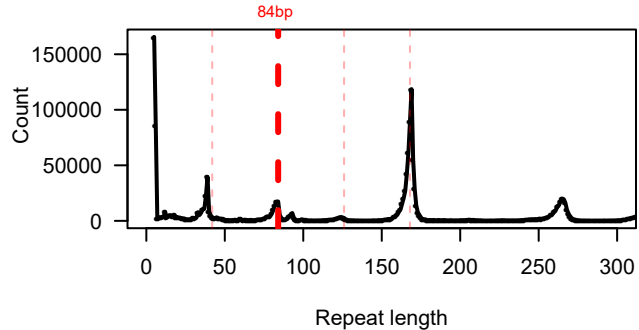**Dlow**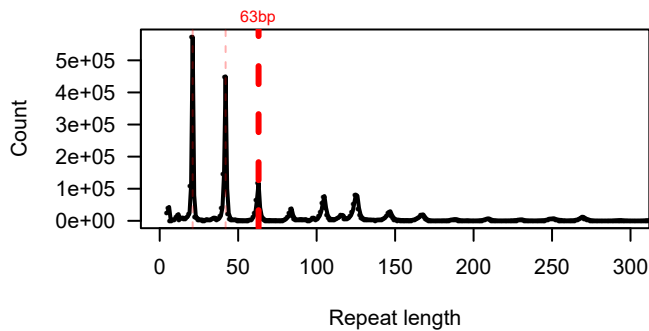**Dath**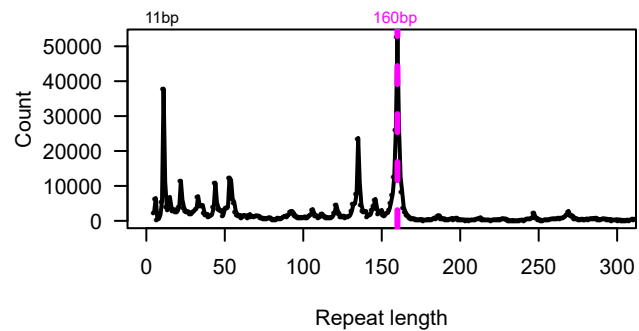**Dsub**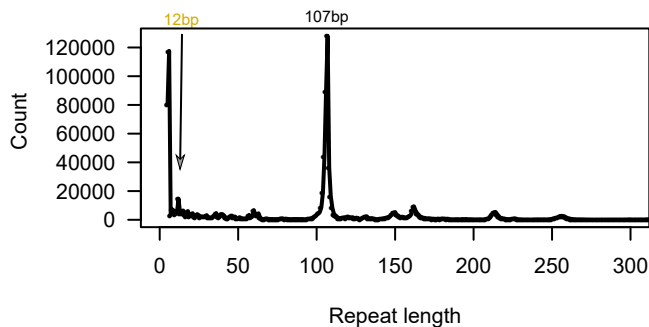

Supplement: supp [file elife-49002-supp-v1.zip › elife_poa_e49002_Figure_4_figure_supplement_3.pdf]

Dpse

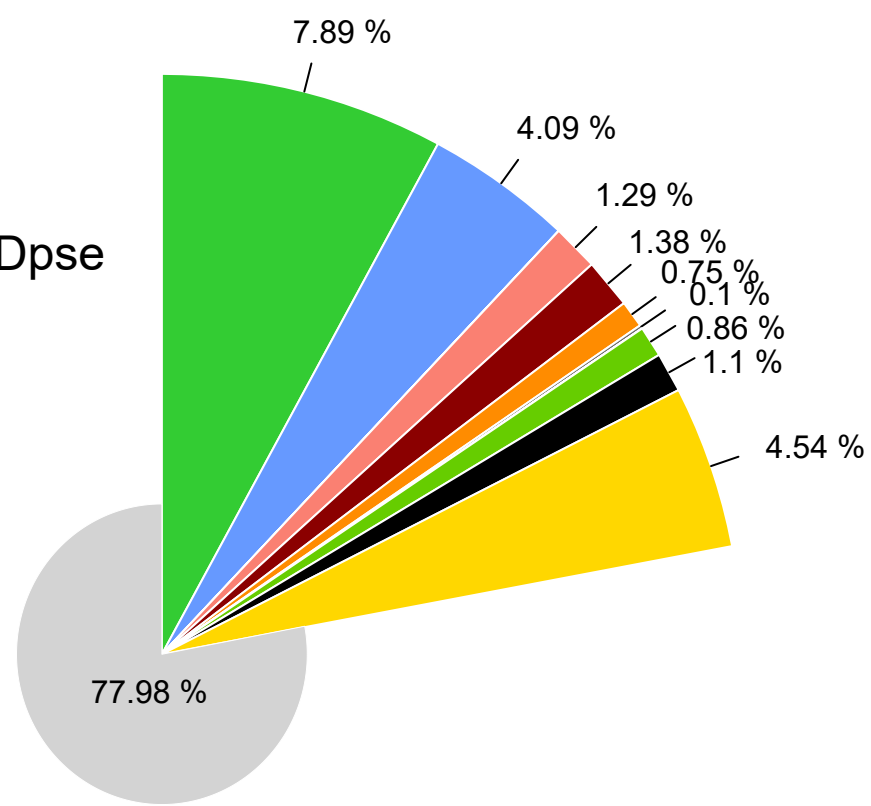

Dath

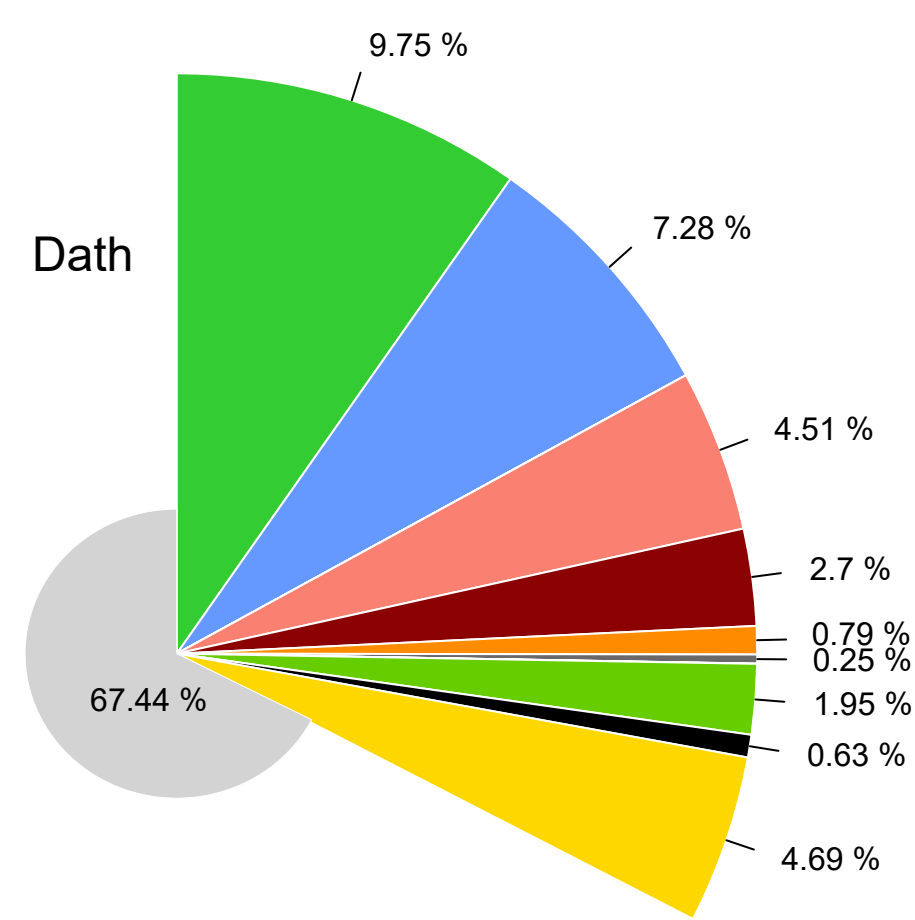

Dsub

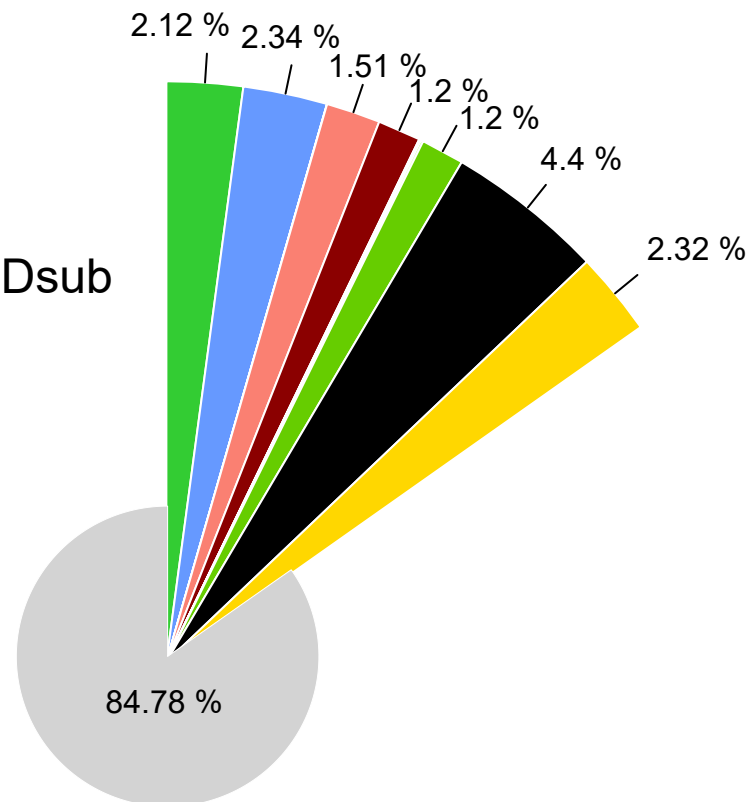

Dlow

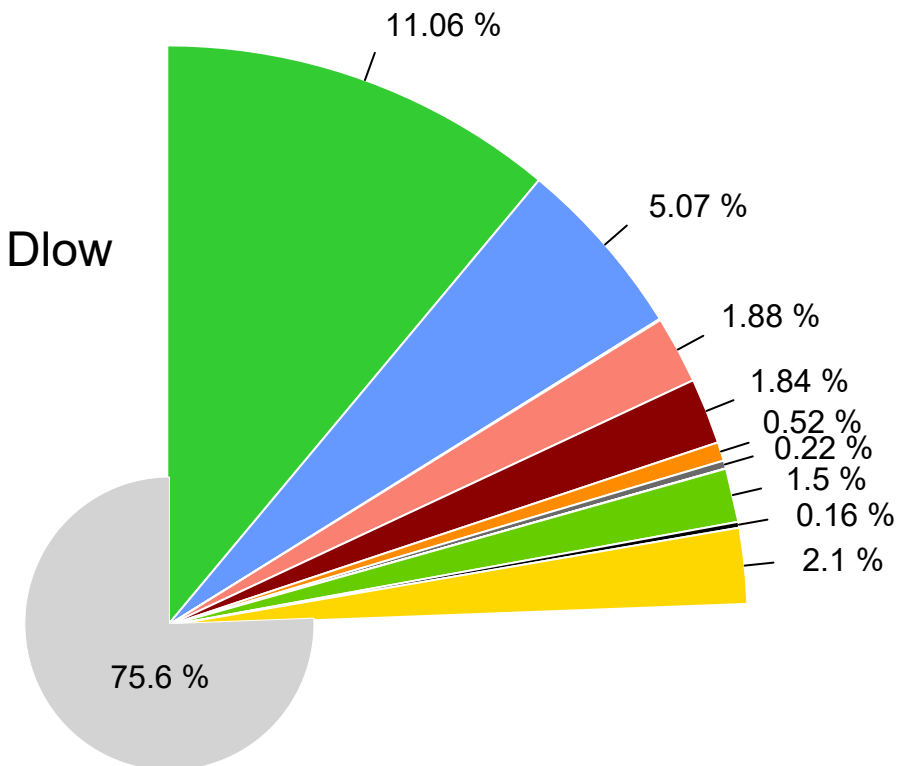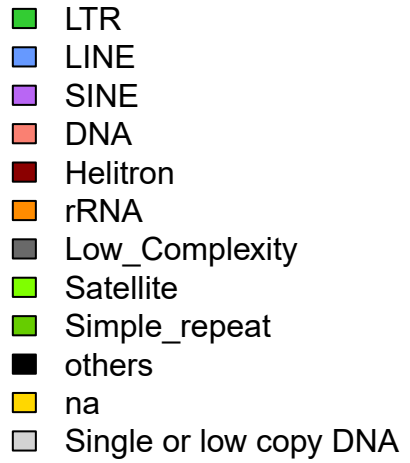

Supplement: supp [file elife-49002-supp-v1.zip › elife_poa_e49002_Figure_8_figure_supplement_2.pdf]

A

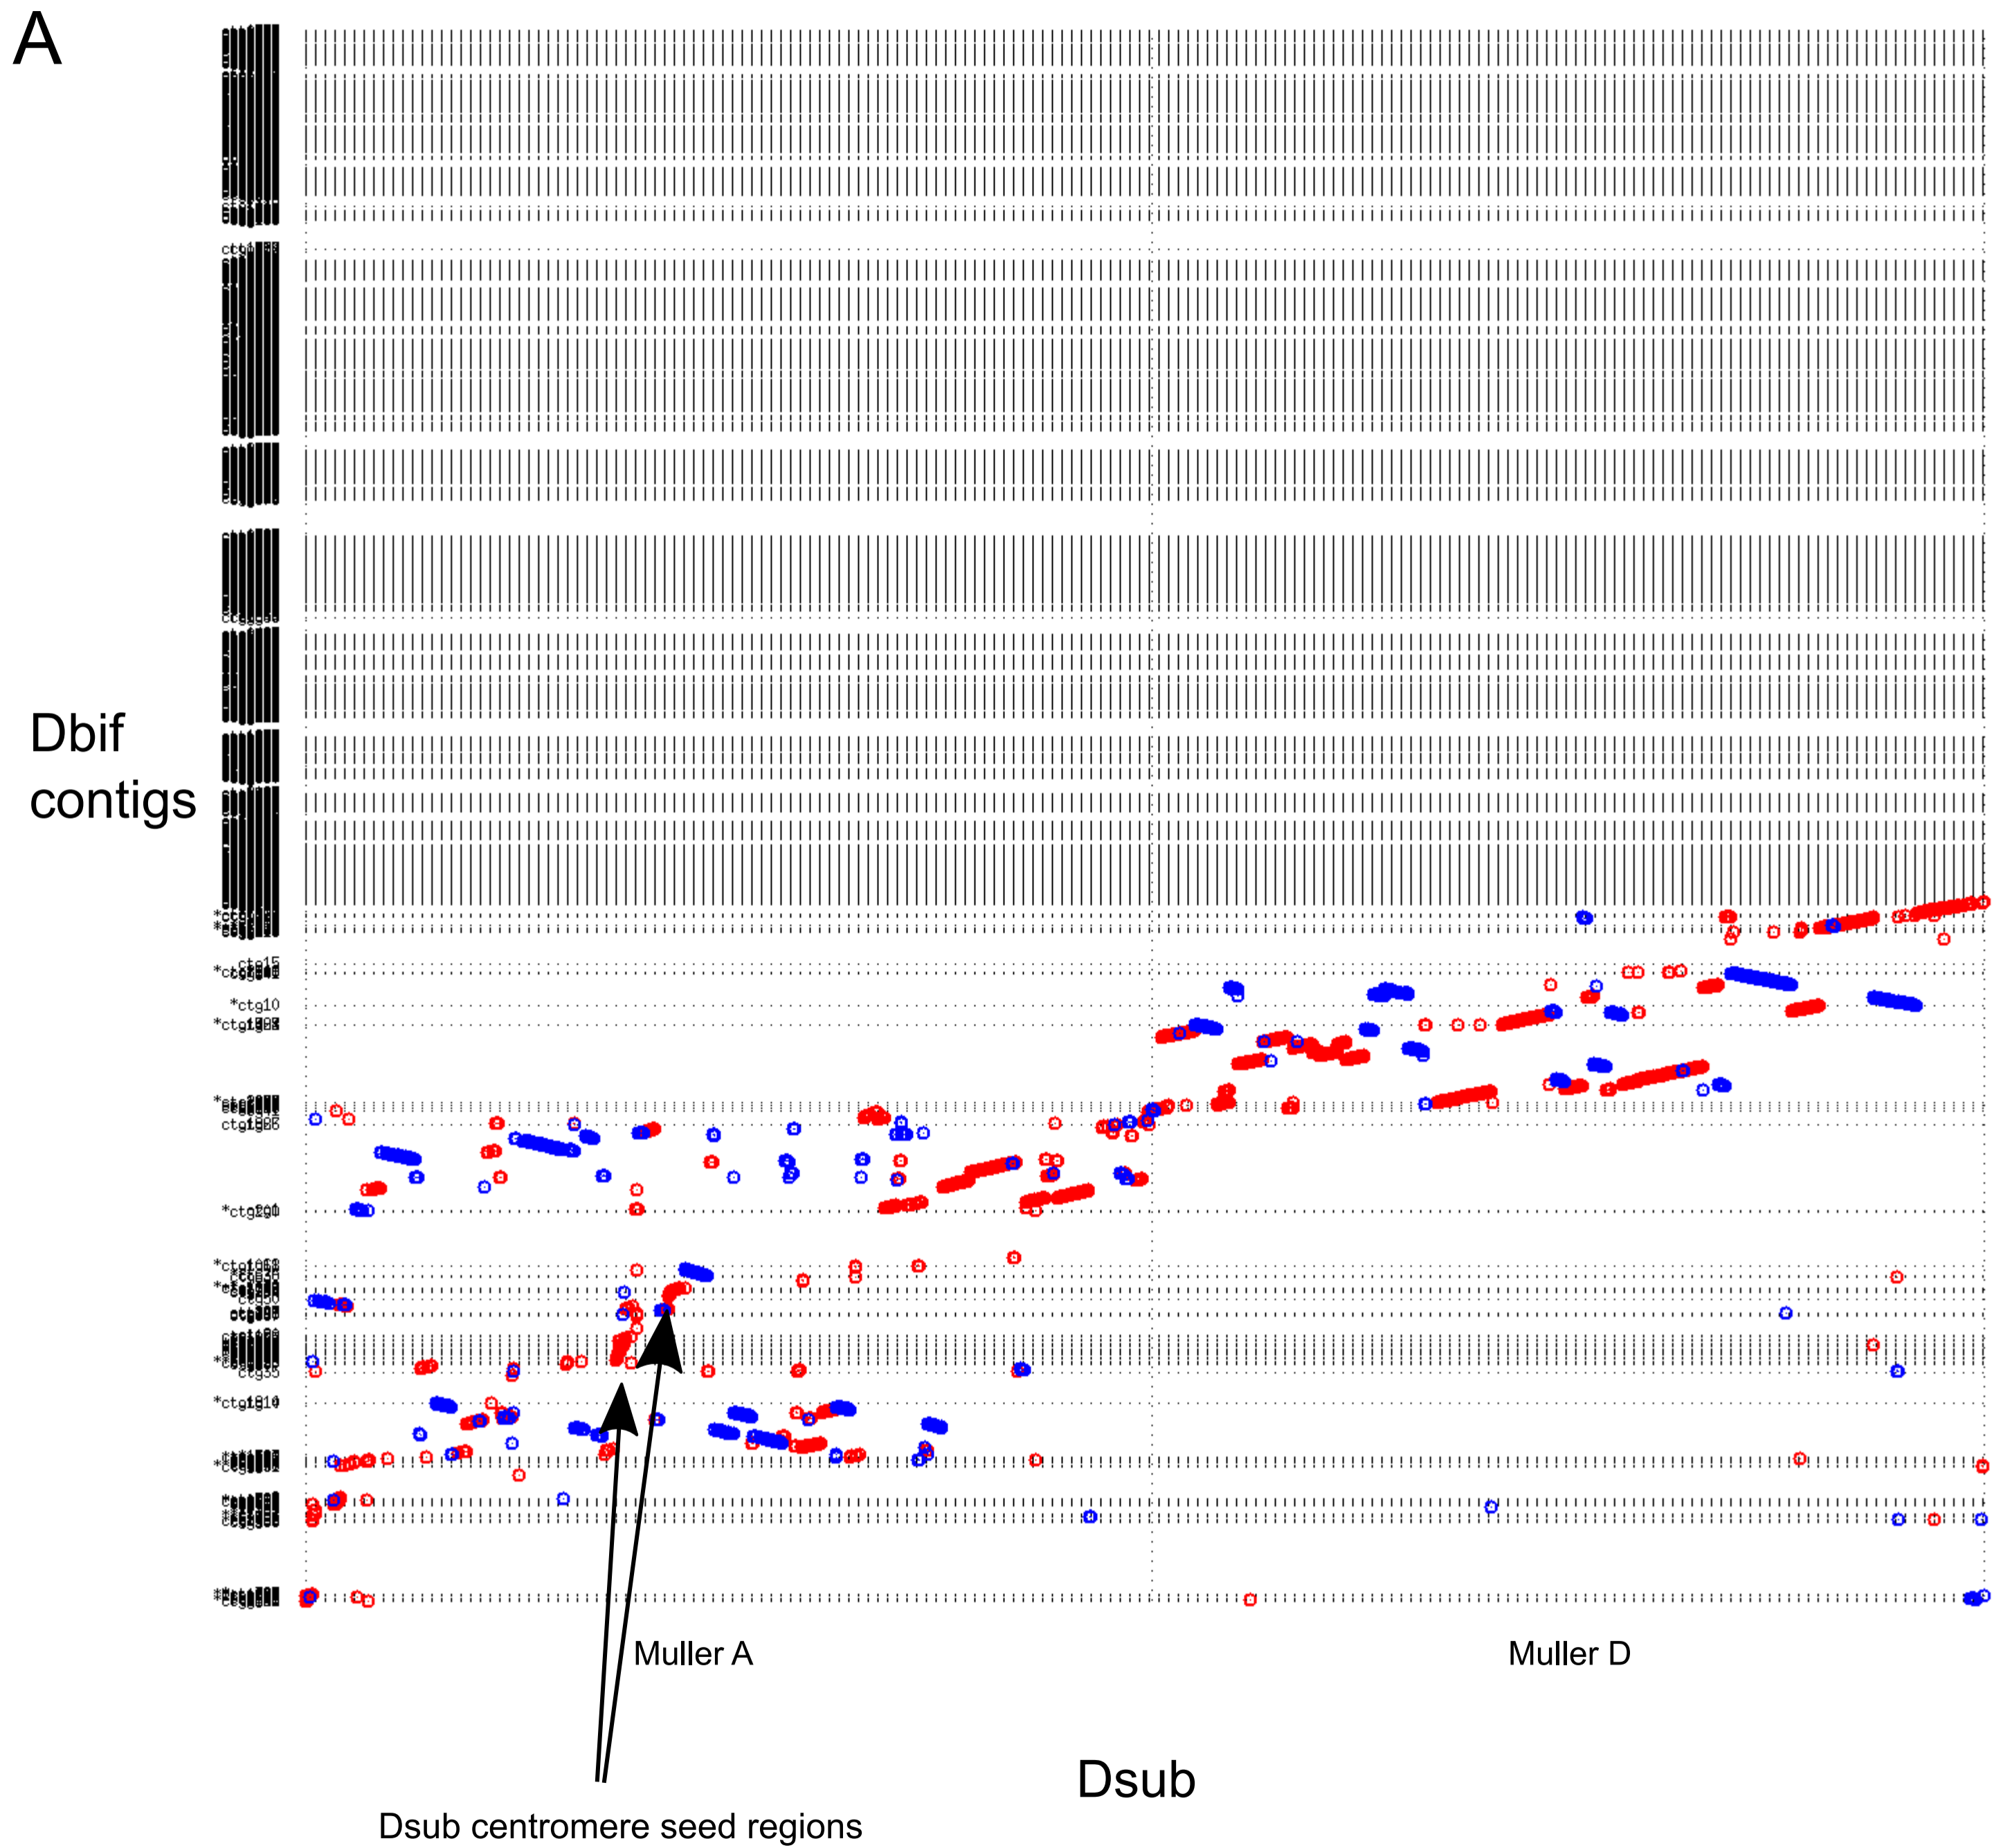

B

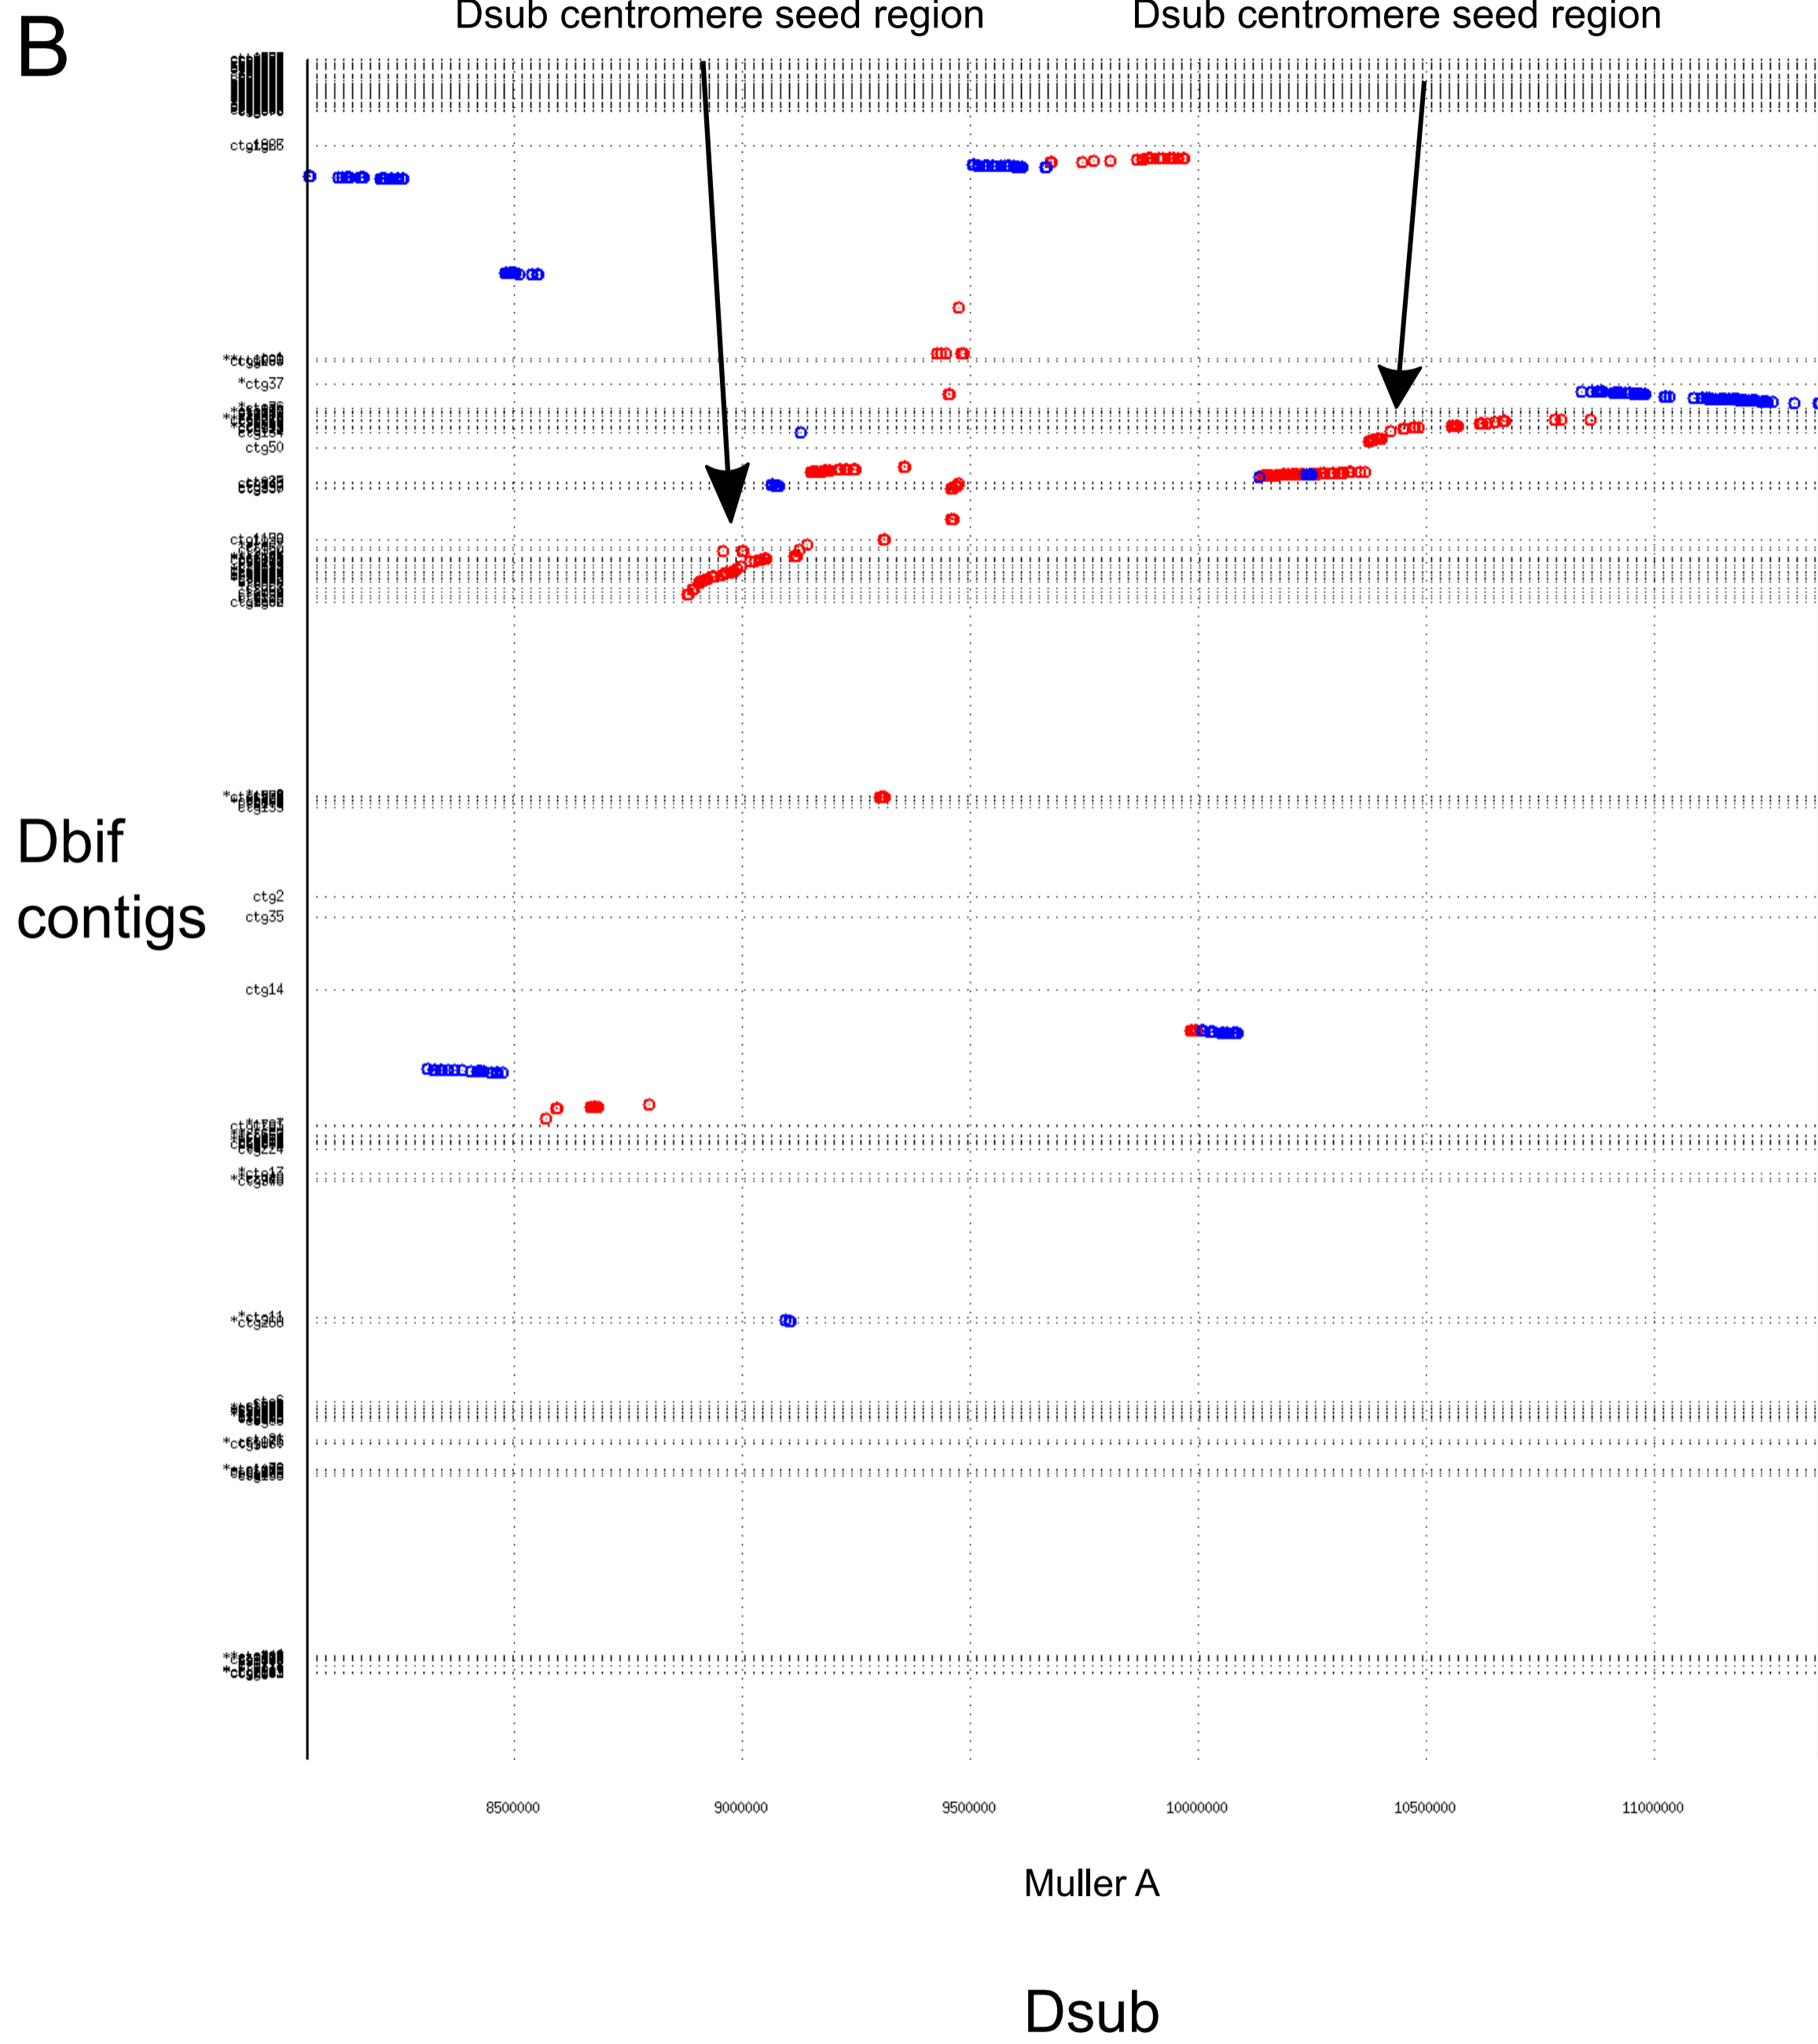

C

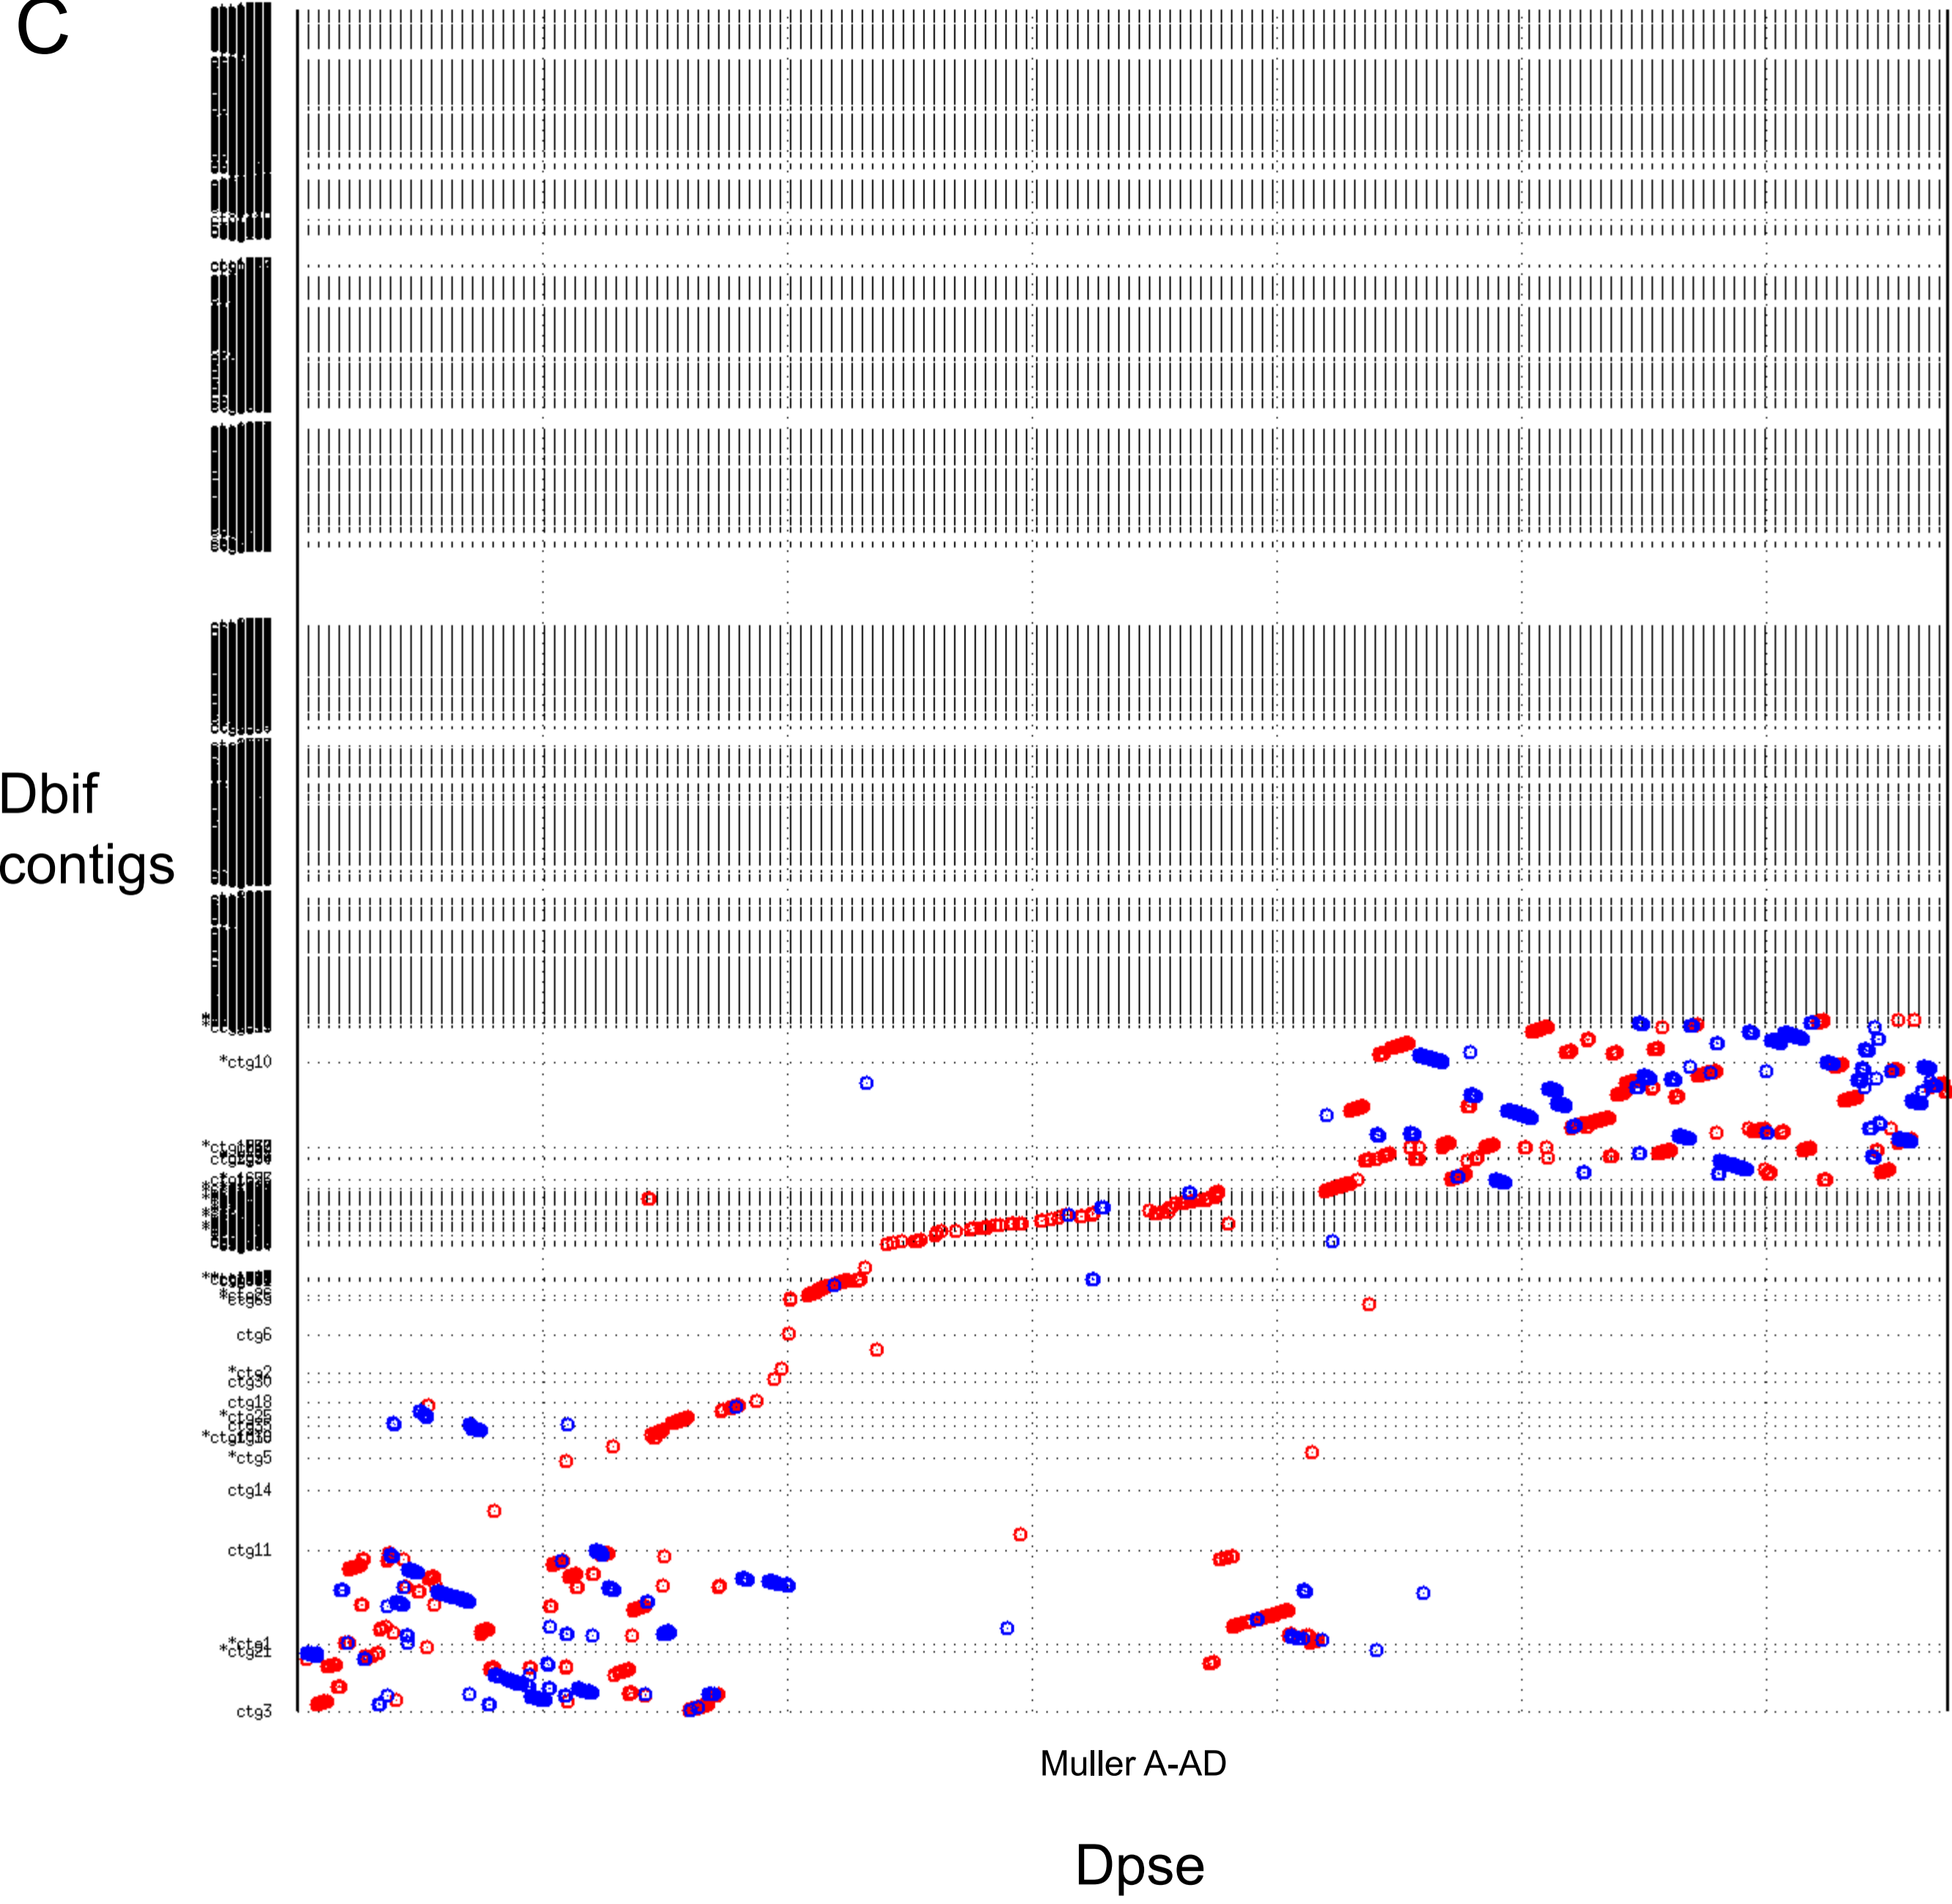

Supplement: supp [file elife-49002-supp-v1.zip › elife_poa_e49002_Figure_3_figure_supplement_2.pdf]
